# Supplementary material
Source: PubMed Central journal article supplement (PMC5330737)
Supplement: jci-127-90350-s001.pdf [file jci-127-90350-s001.pdf]

**A** **B**

***Ltb4r1* expression in B1 cell**

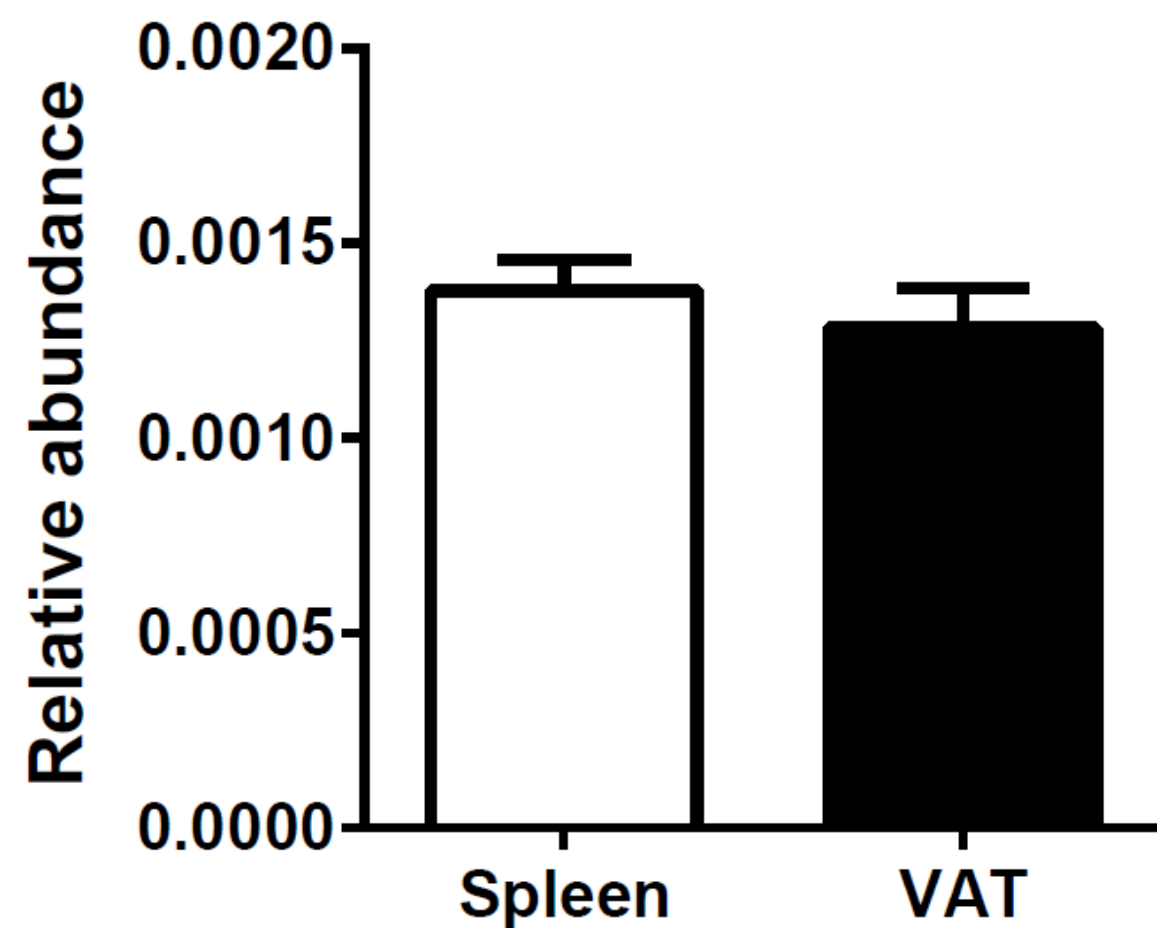

— Spleen  
— VAT

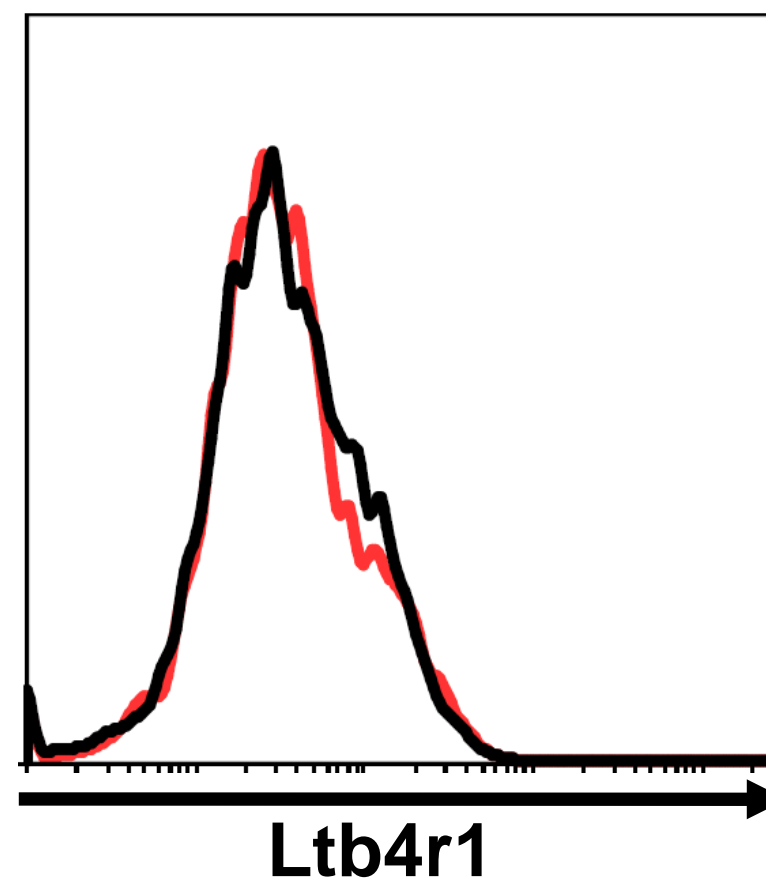

***Ltb4r1* protein level in B1 cell**

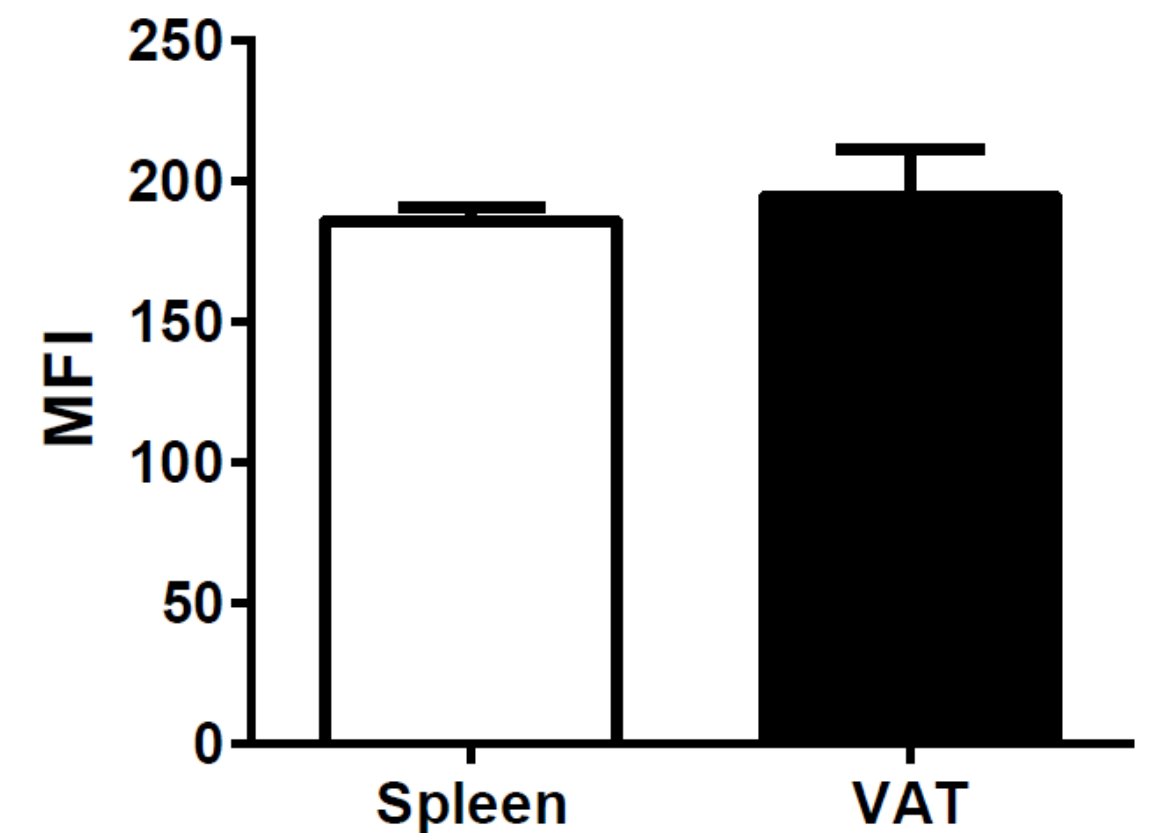

**Supplementary Figure 1.** *Ltb4r1* expression pattern in tissue B1 (Cd19<sup>+</sup>Cd5<sup>+</sup>) cells. The gene expression of *Ltb4r1* (**A**) and its protein level on the cell surface (**B**) of spleen and VAT B1 cells. Data are presented as mean ± SEM. n=6 per group. All panels were analyzed by Student's *t* test. VAT, visceral adipose tissue.

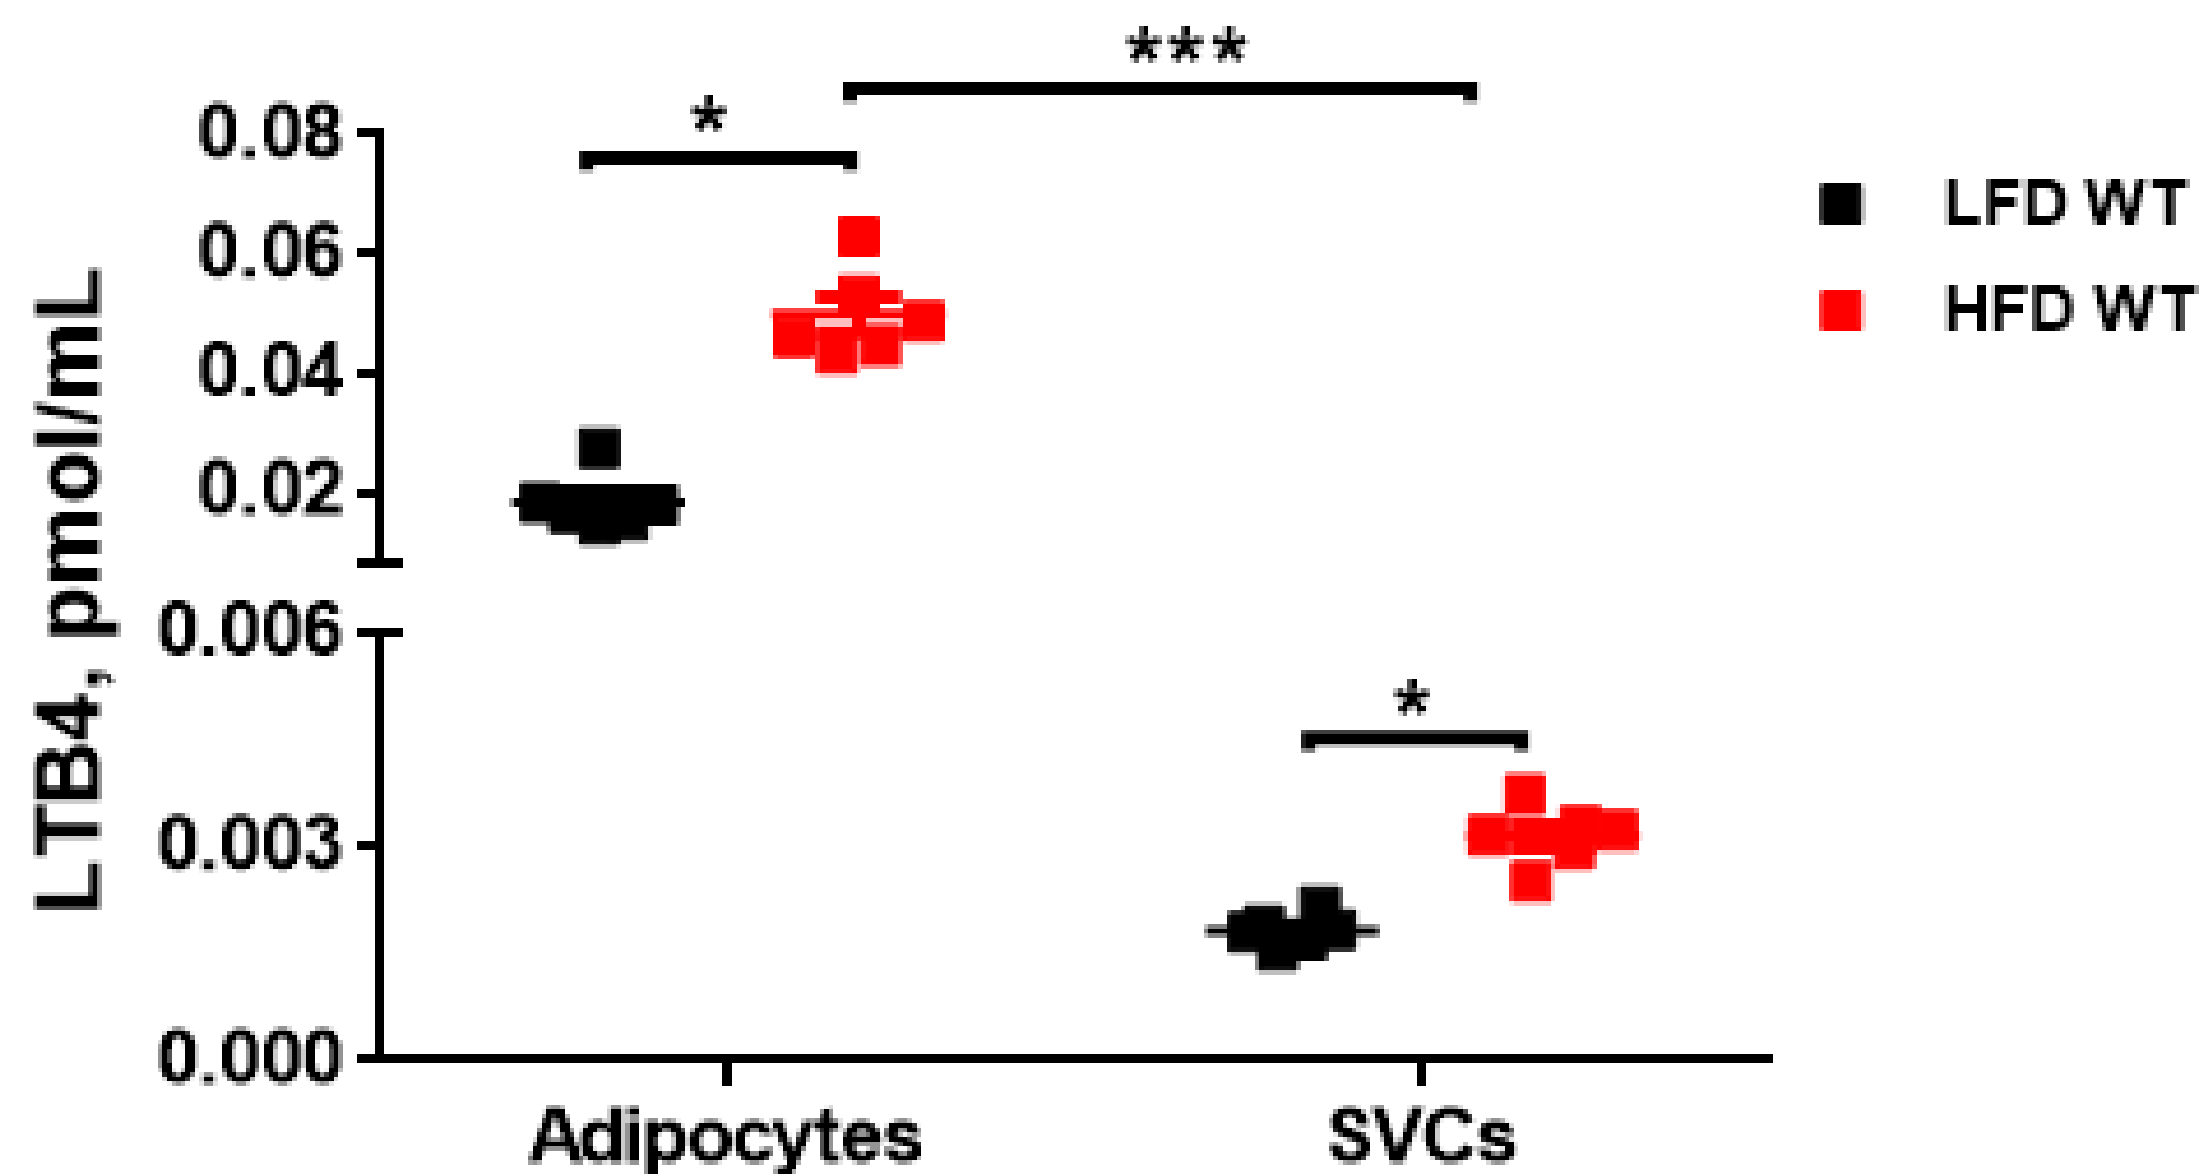

**Supplementary Figure 2.** LTB4 secretion by adipocytes and SVCs of LFD and HFD-fed WT mice. Mature adipocytes and SVCs were isolated from VAT of LFD and HFD WT mice and then cultured in 12-well plates ( $0.5 \times 10^6$ /well). After 24 hours, LTB4 concentrations in culture medium was measured by ELISA kit. Data are presented as mean  $\pm$  SEM.  $n=6$  per group. \* $P<0.05$  by one-way ANOVA with Bonferroni's post test. SVCs, stromal vascular cells.

**A**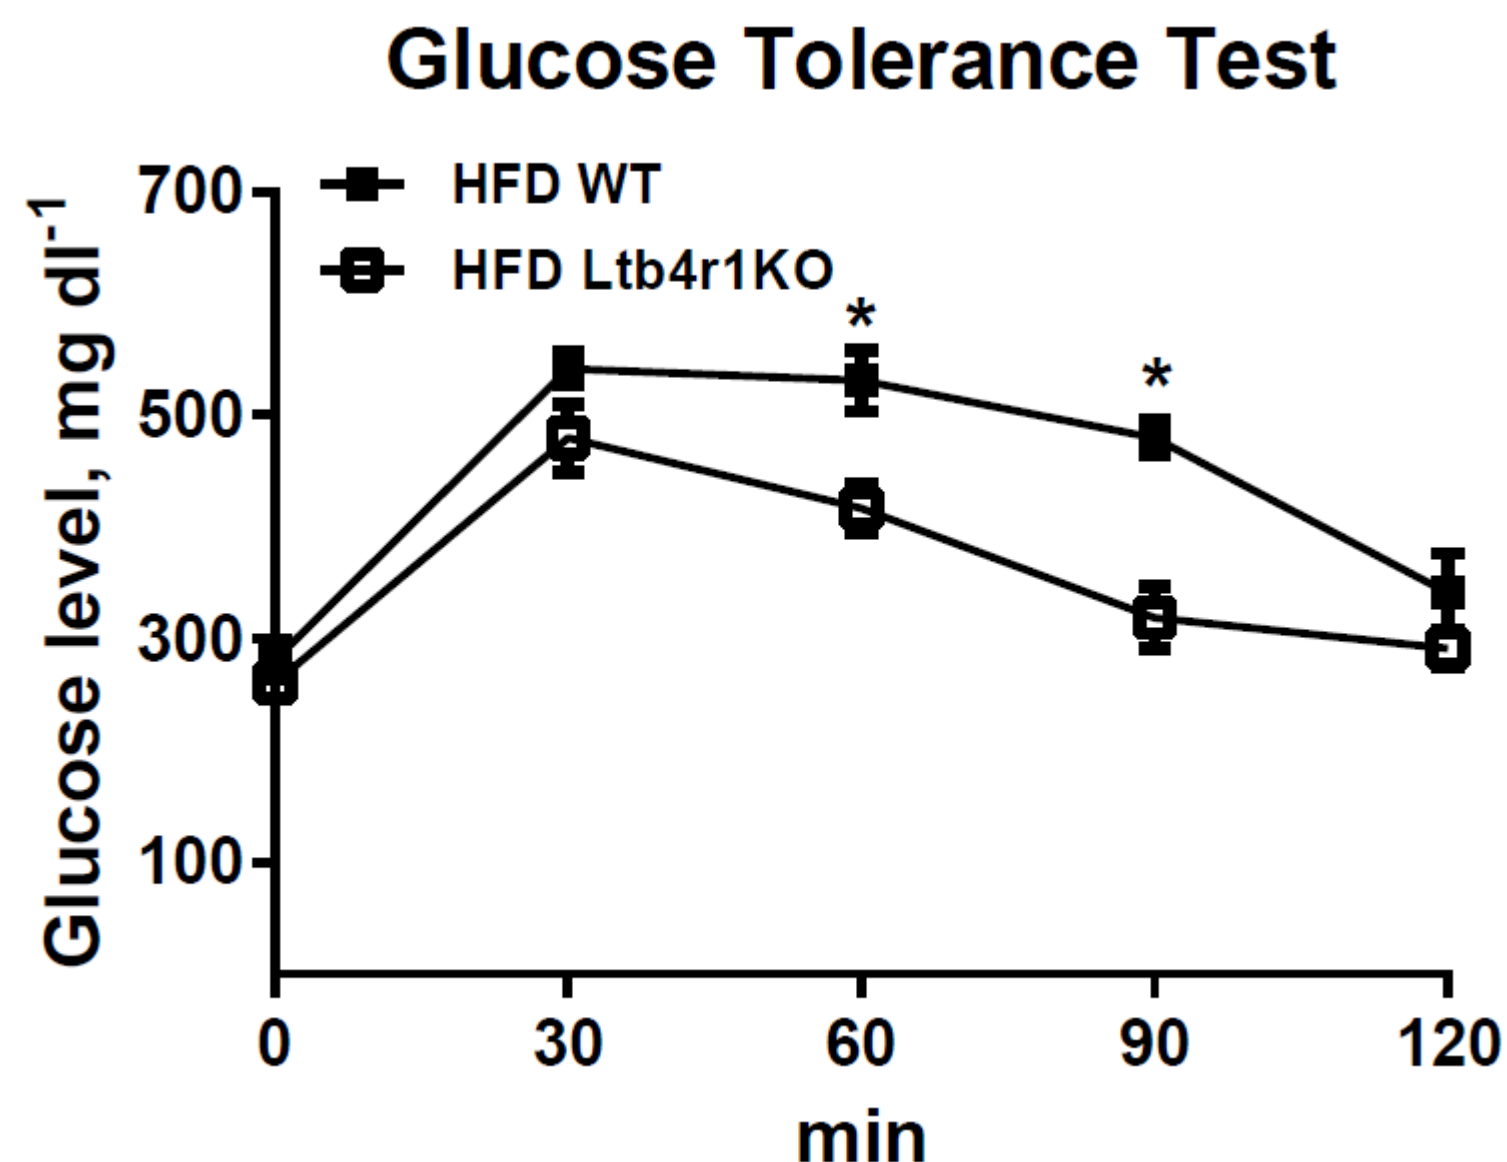**B**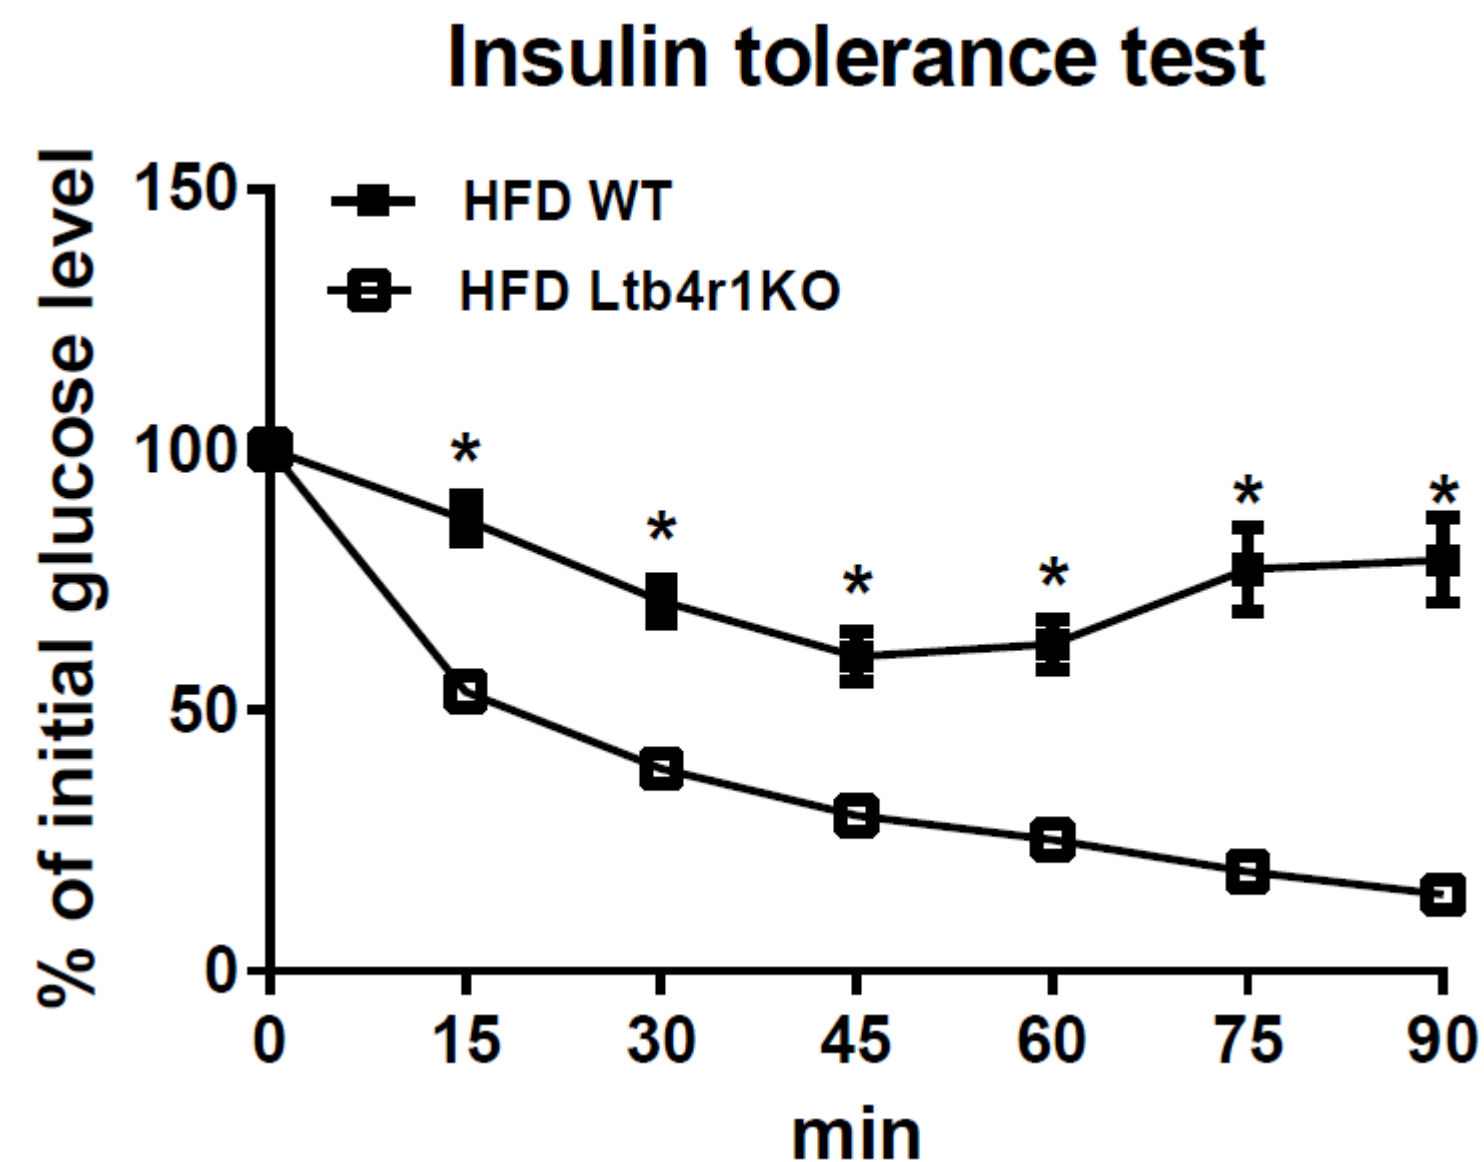

**Supplementary Figure 3.** (A, B) Glucose tolerance and insulin tolerance tests of HFD-fed Ltb4r1KO and WT mice. Please note that the GTT and ITT results for the HFD WT mice are the same as in Figure 1 and are shown here again simply for comparative purposes. Data are presented as mean  $\pm$  SEM.  $n=6$  for HFD WT group and  $n=8$  for HFD Ltb4r1KO group. \* $P<0.05$ , all panels were analyzed by one-way ANOVA with Bonferroni's post test.

**A**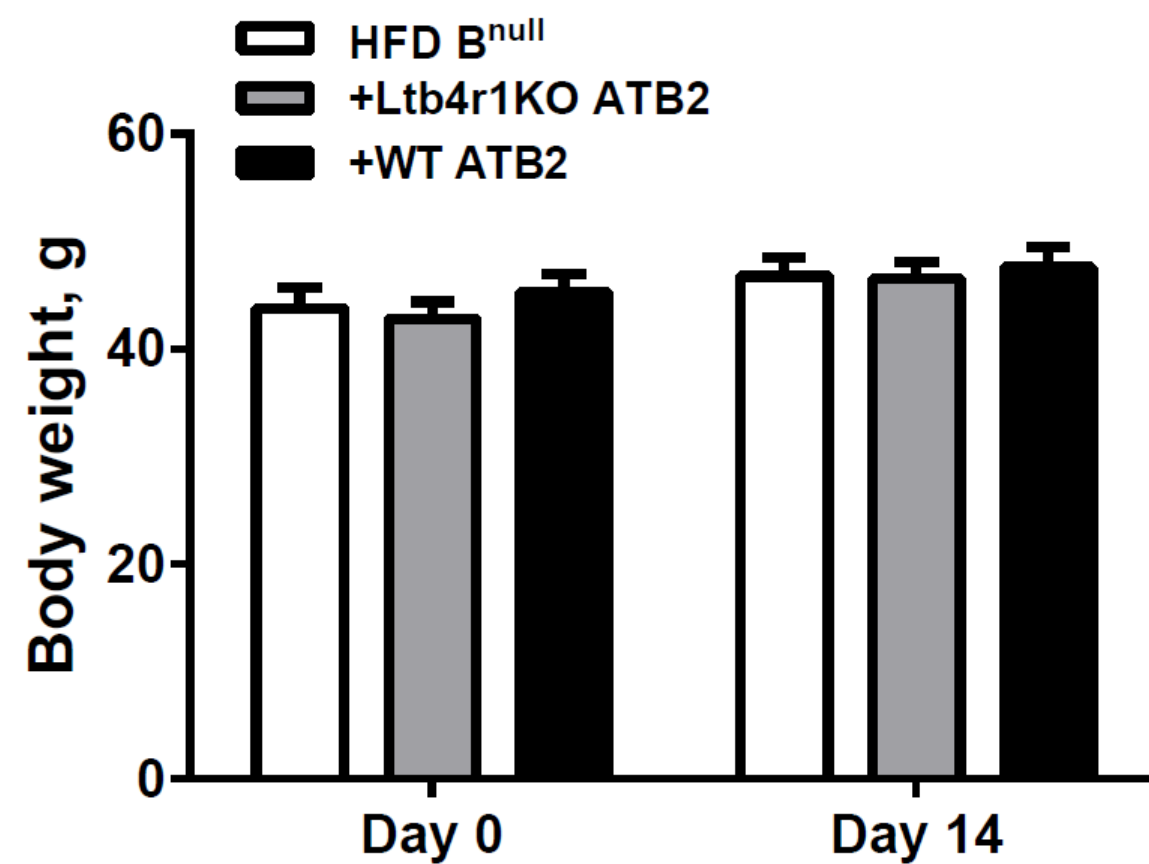**B**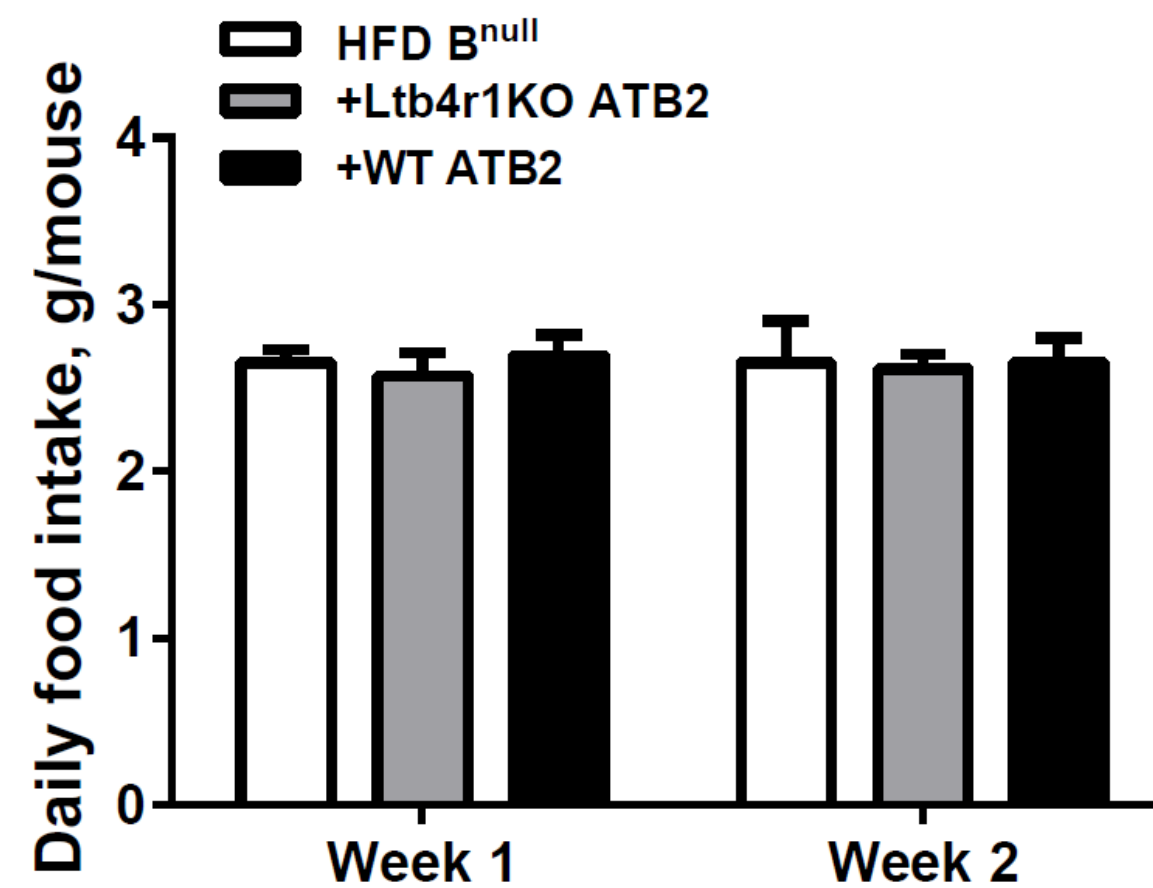**C**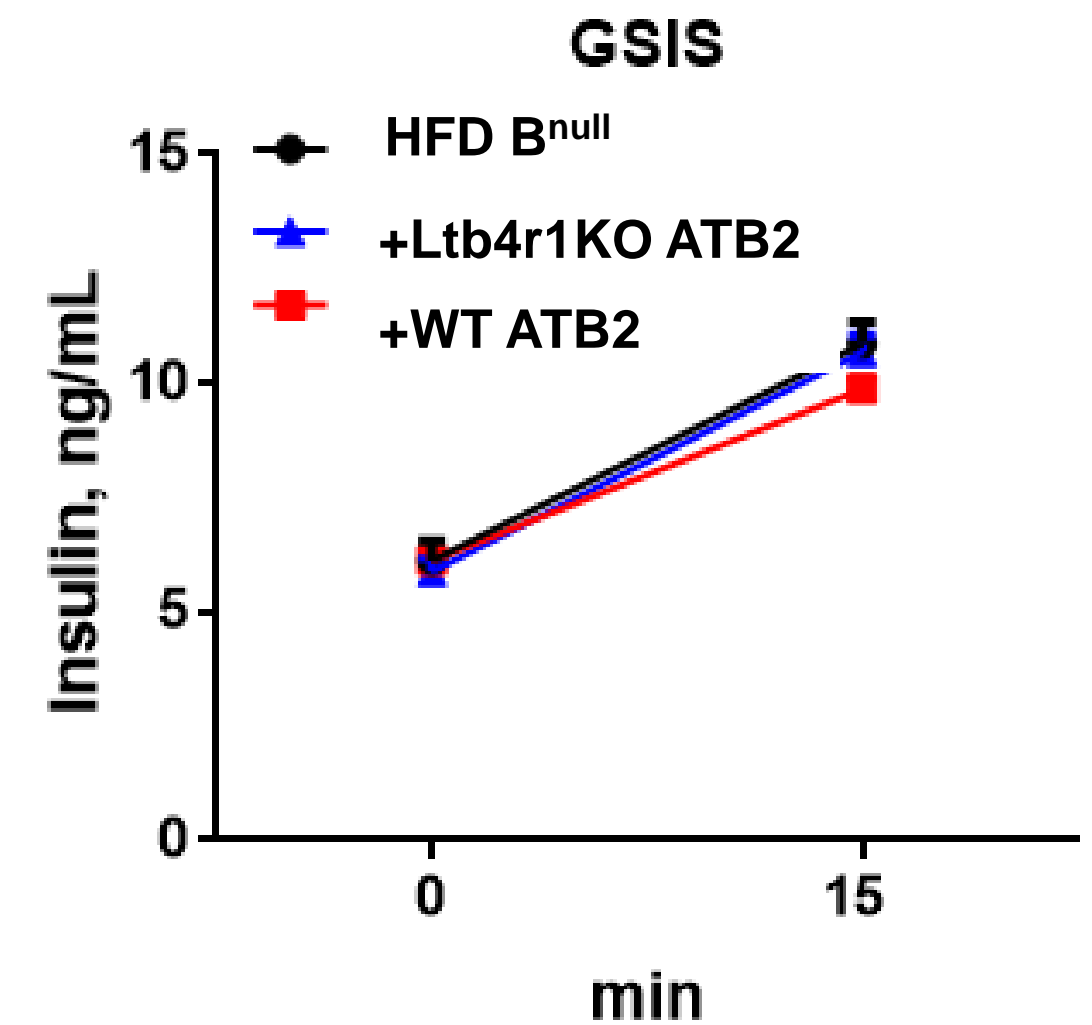

**Supplementary Figure 4.** (A, B) The body weight and daily food intake of HFD-fed B<sup>null</sup> mice after adipose tissue B2 (ATB2) cell transfer. (C) Plasma Insulin levels of HFD-fed B<sup>null</sup> mice before and 15 minutes after glucose injection (1mg g<sup>-1</sup> body weight). Data are presented as mean ± SEM. n=6 per group. All panels were analyzed by one-way ANOVA with Bonferroni's post test. GSIS, glucose-stimulated insulin secretion.

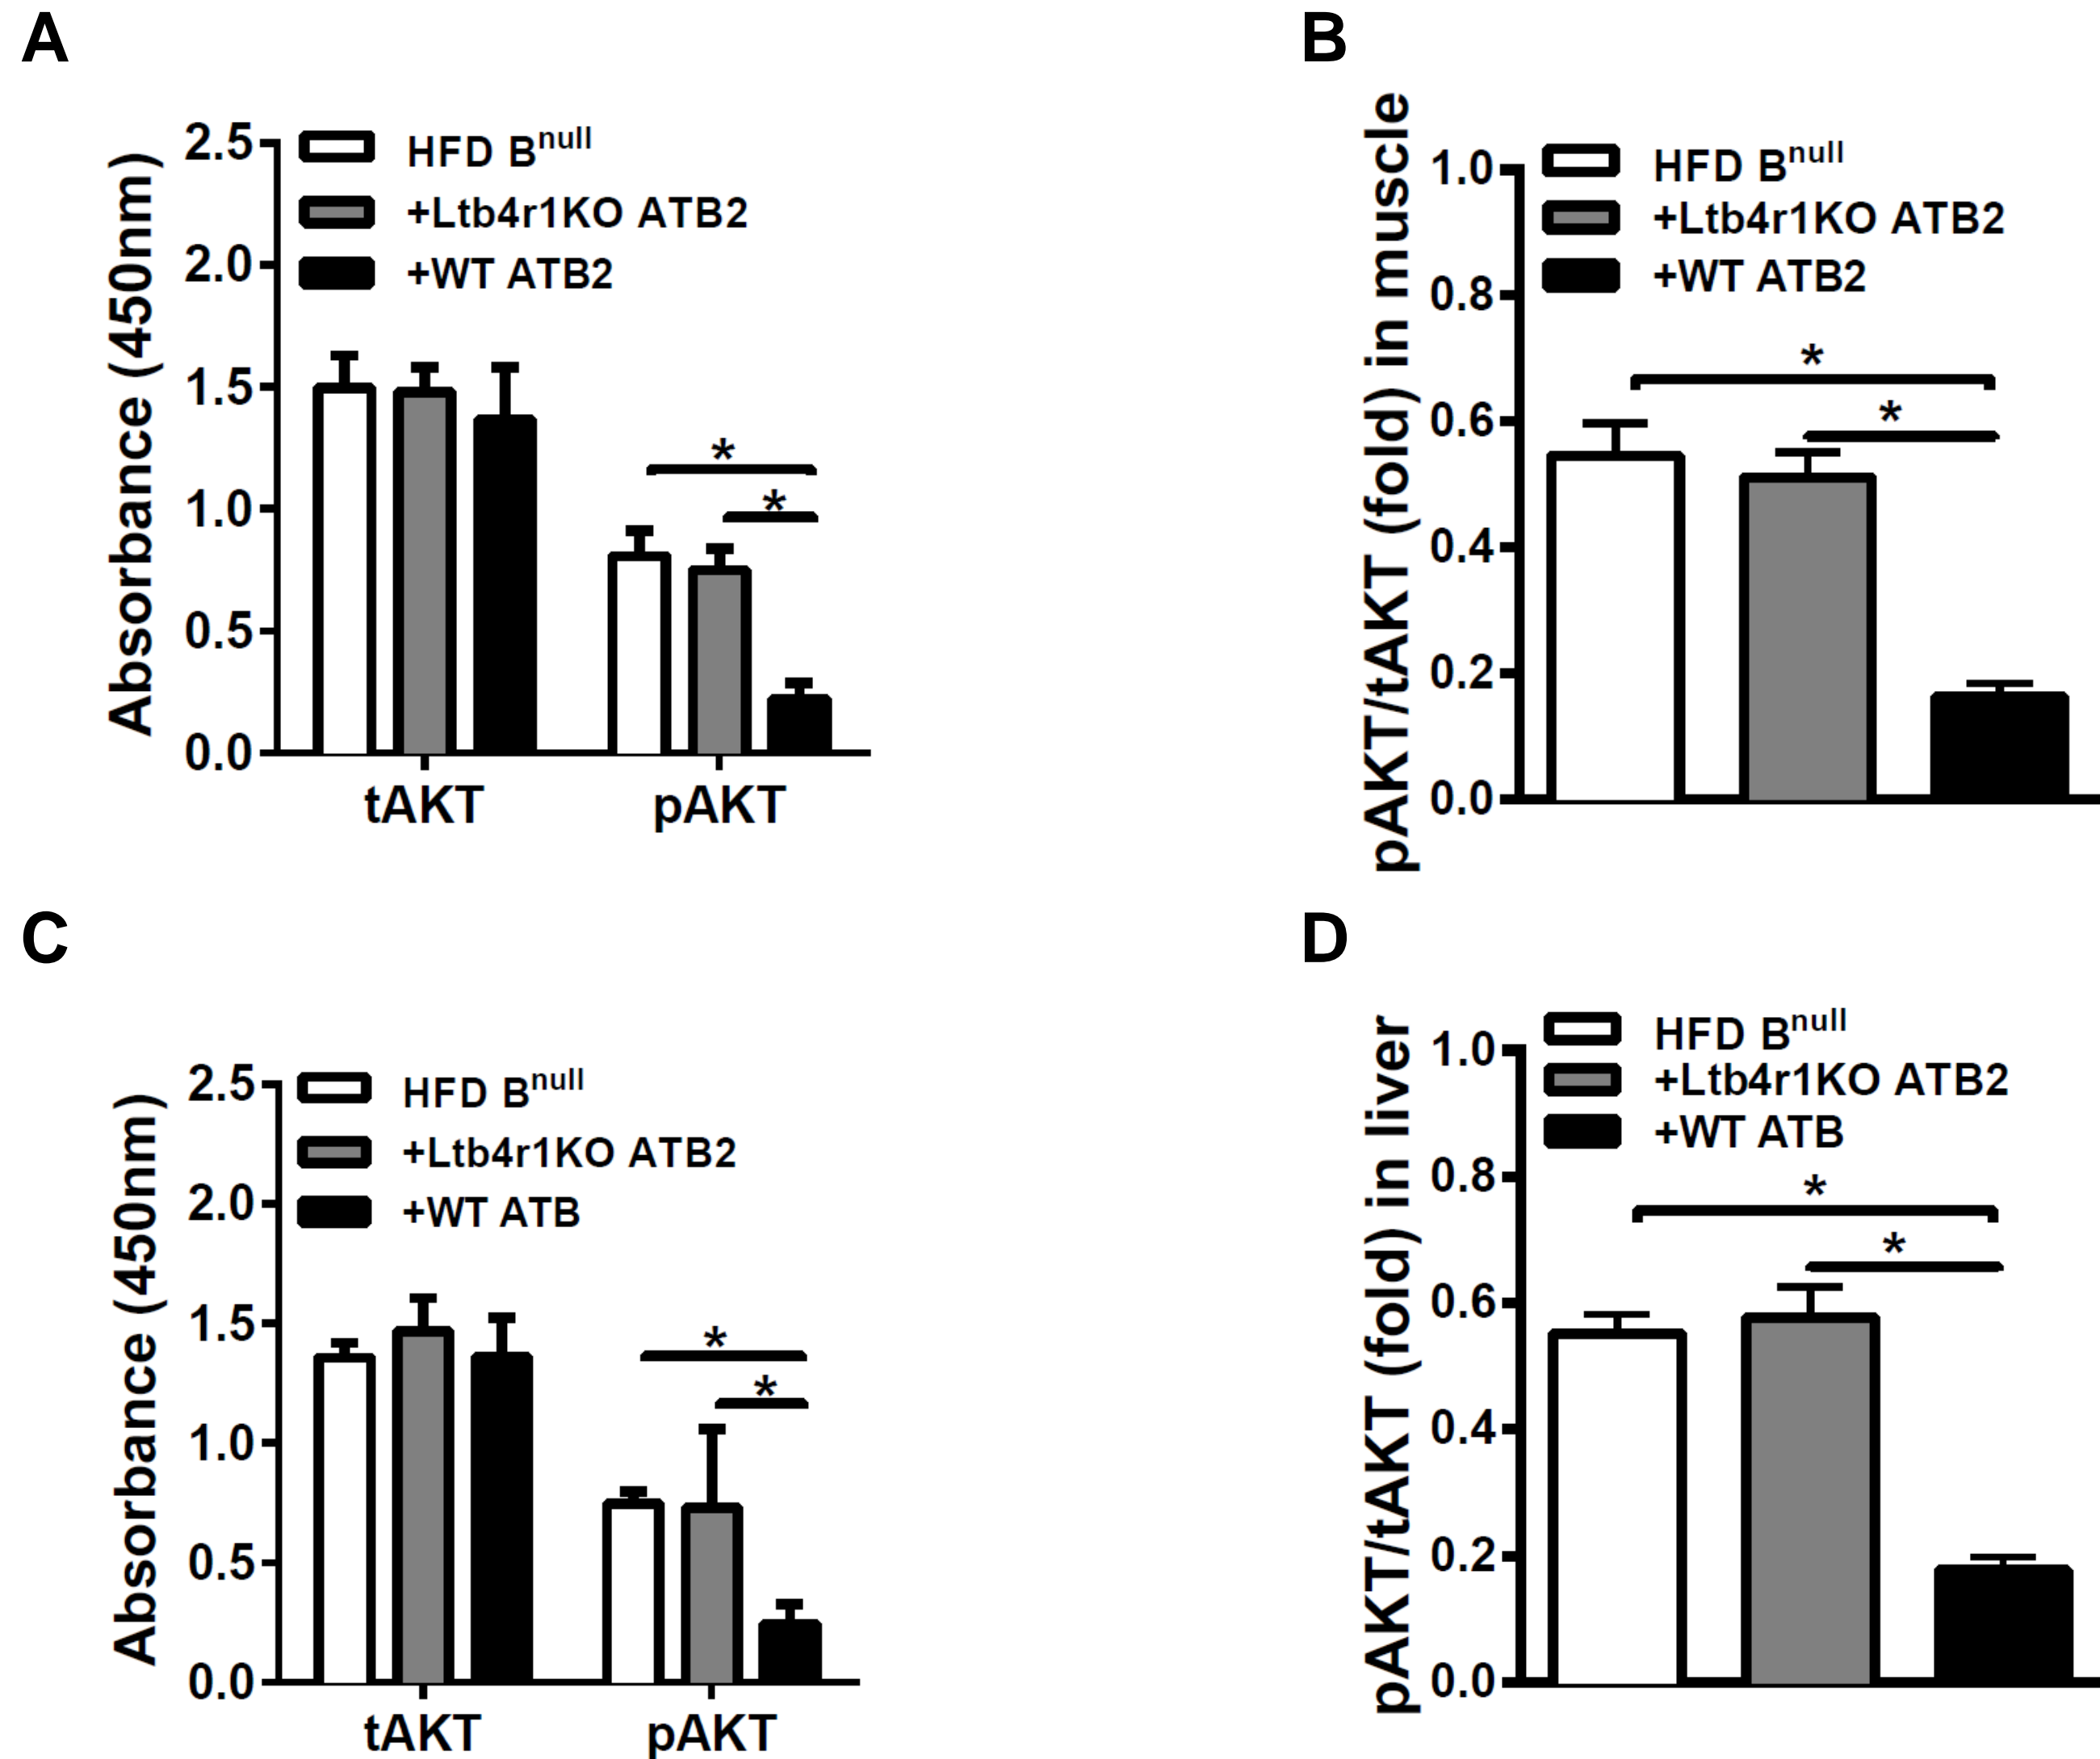

**Supplementary Figure 5.** After ATB2 cell transfer, phosphorylation of Akt was measured in skeletal muscle (**A, B**) and liver (**C, D**) of HFD B<sup>null</sup>. Data are presented as mean  $\pm$  SEM. n=5 per group. \* $P$ <0.05, all panels were analyzed by one-way ANOVA with Bonferroni's post test.

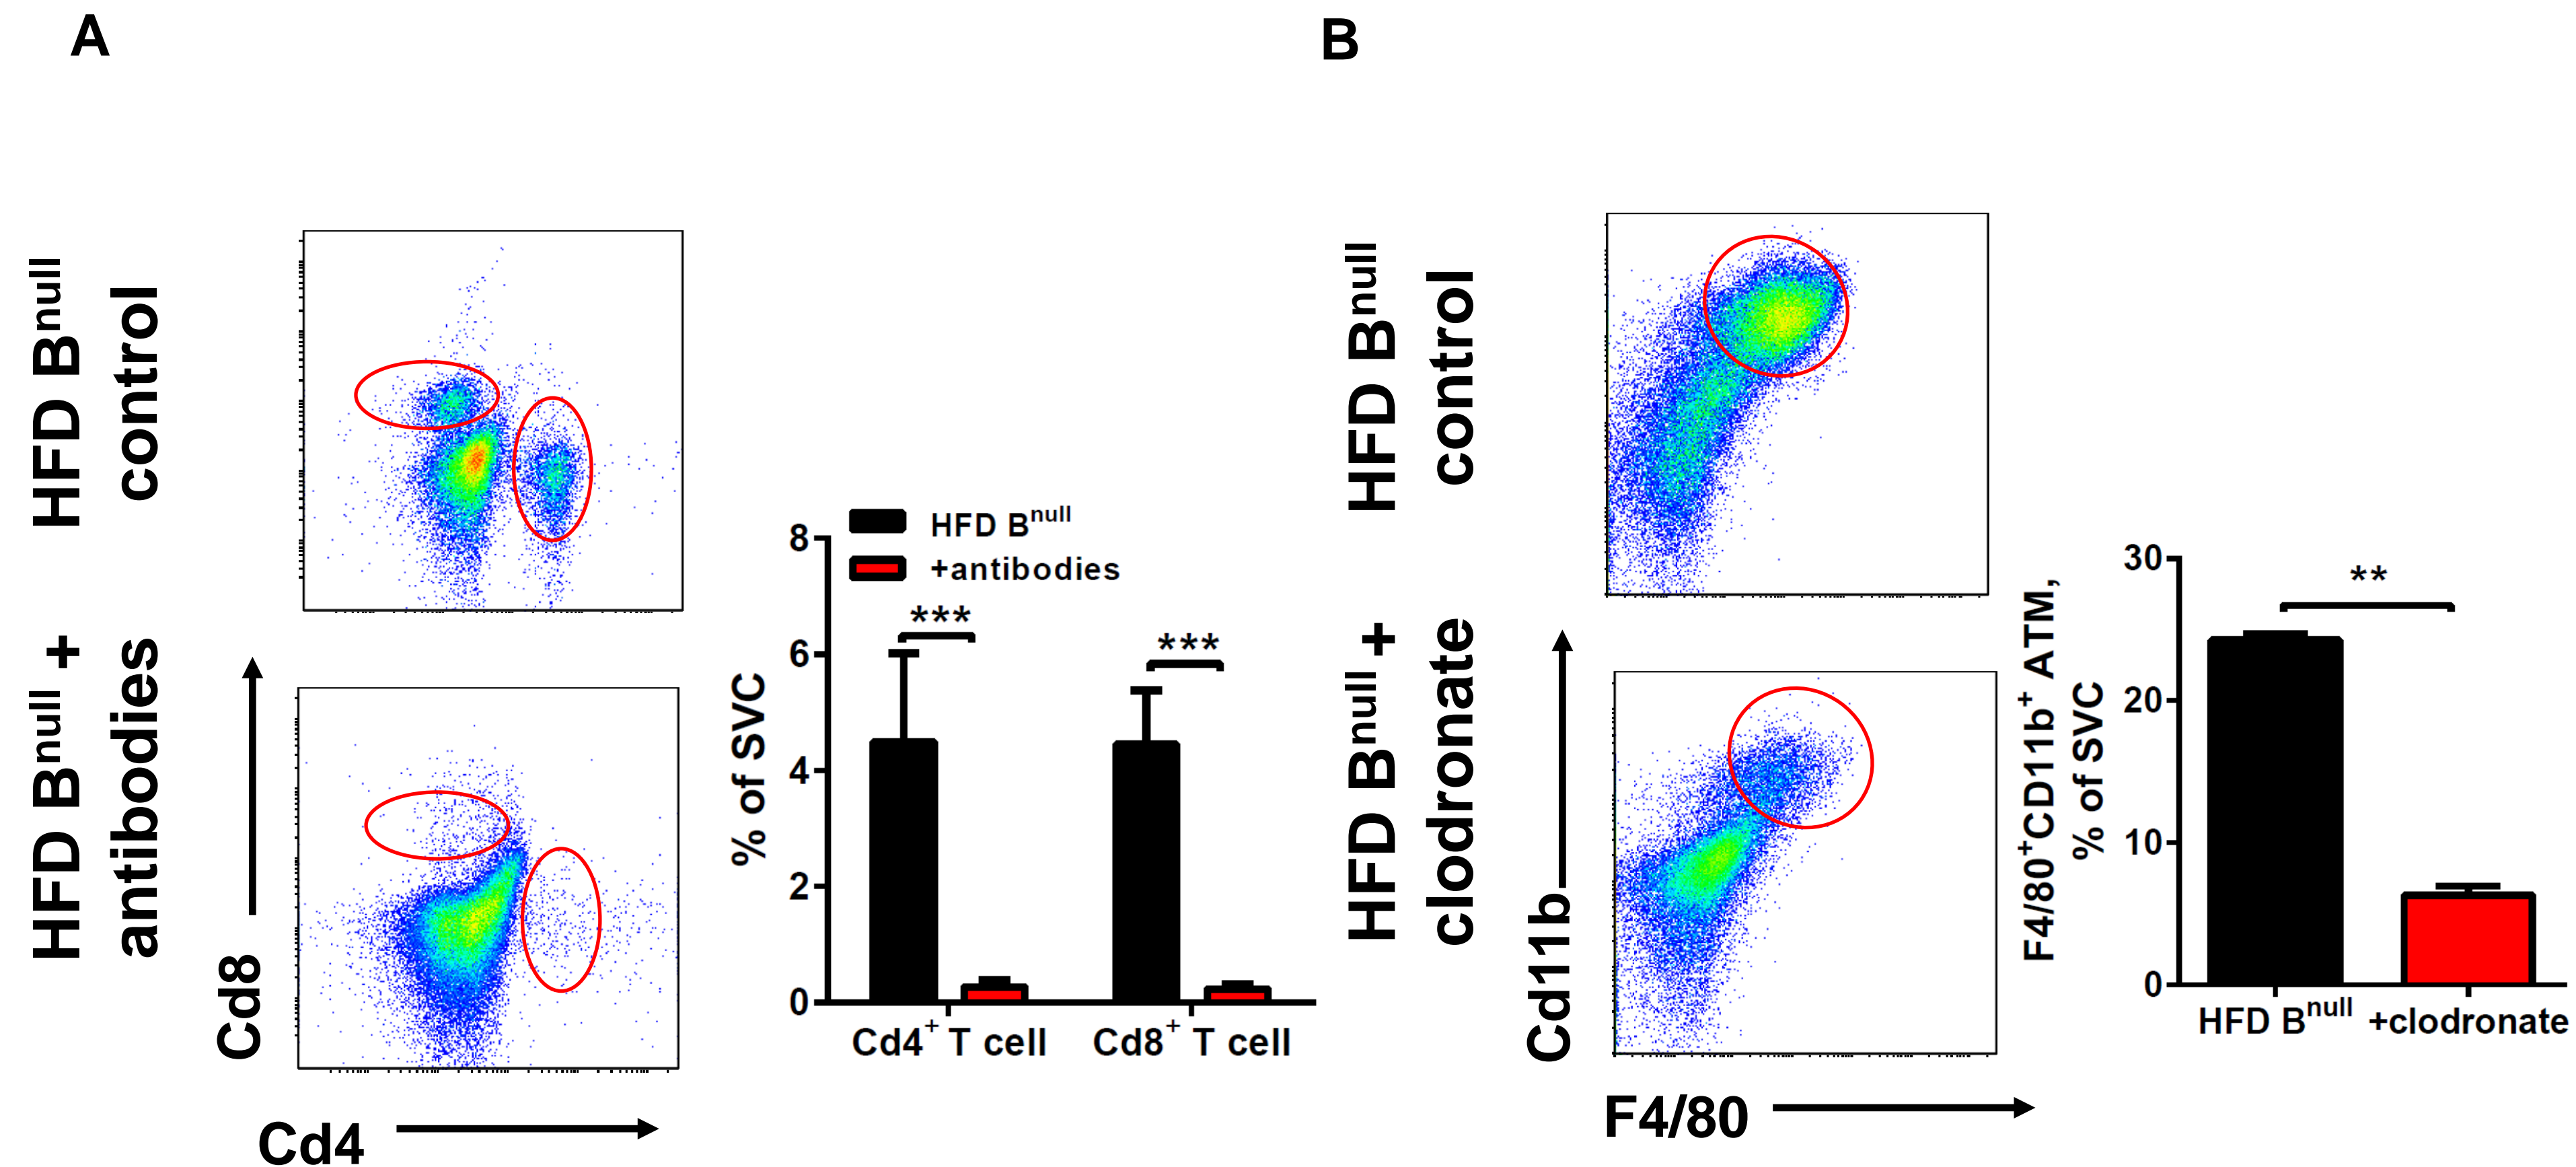

**Supplementary Figure 6.** The population of T cells (**A**) or macrophages (**B**) in VAT of HFD B<sup>null</sup> mice after treatment with either T cell-depleting antibodies or clodronate. Data are presented as mean ± SEM. n=6 per group. \*\* $P < 0.01$ , \*\*\* $P < 0.001$ , all panels were analyzed by Student's  $t$  test.

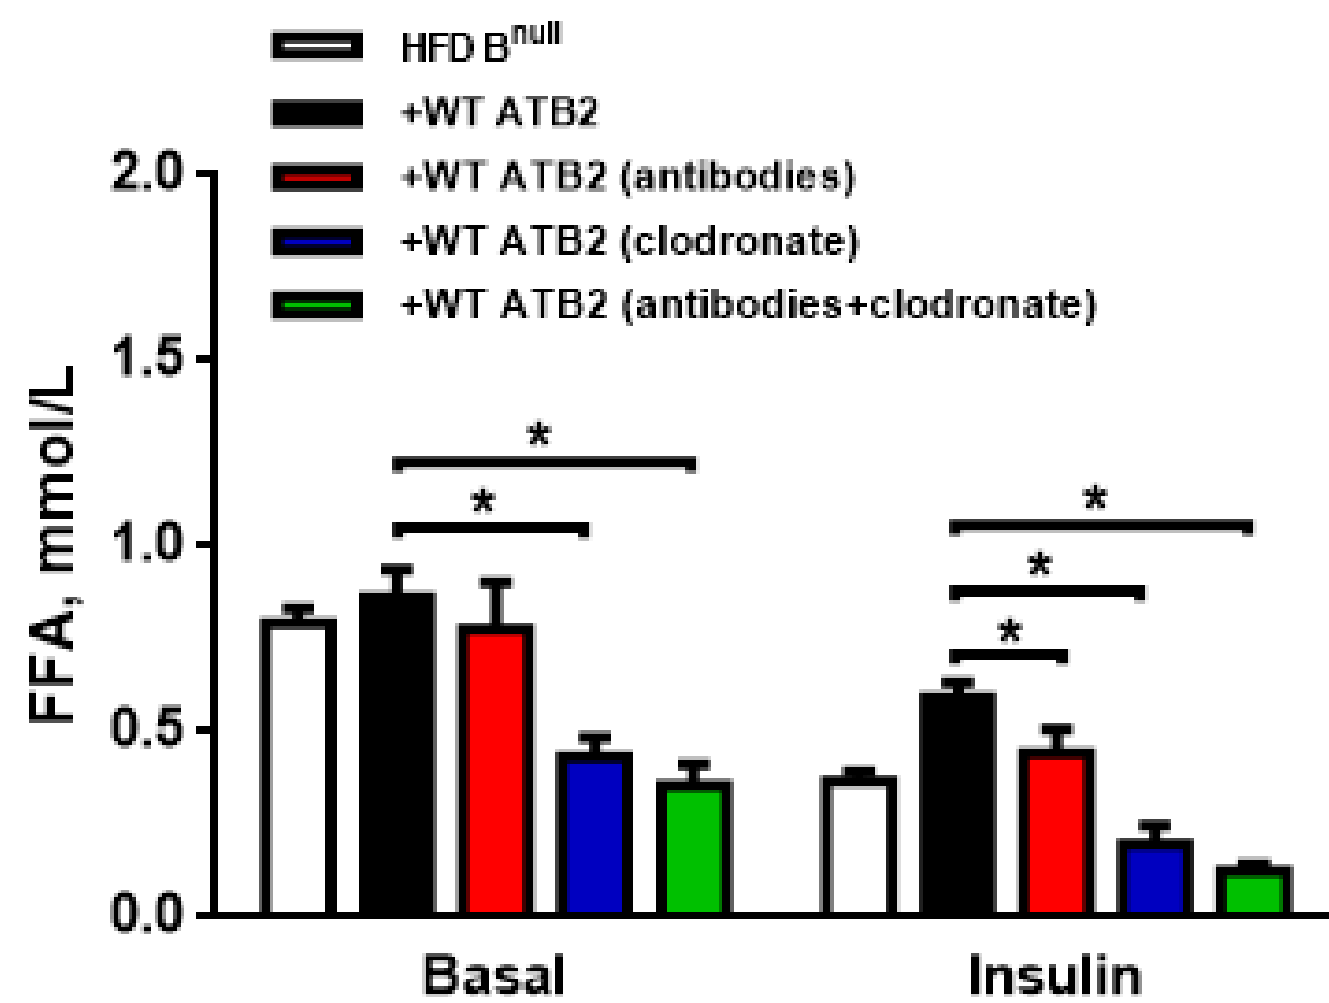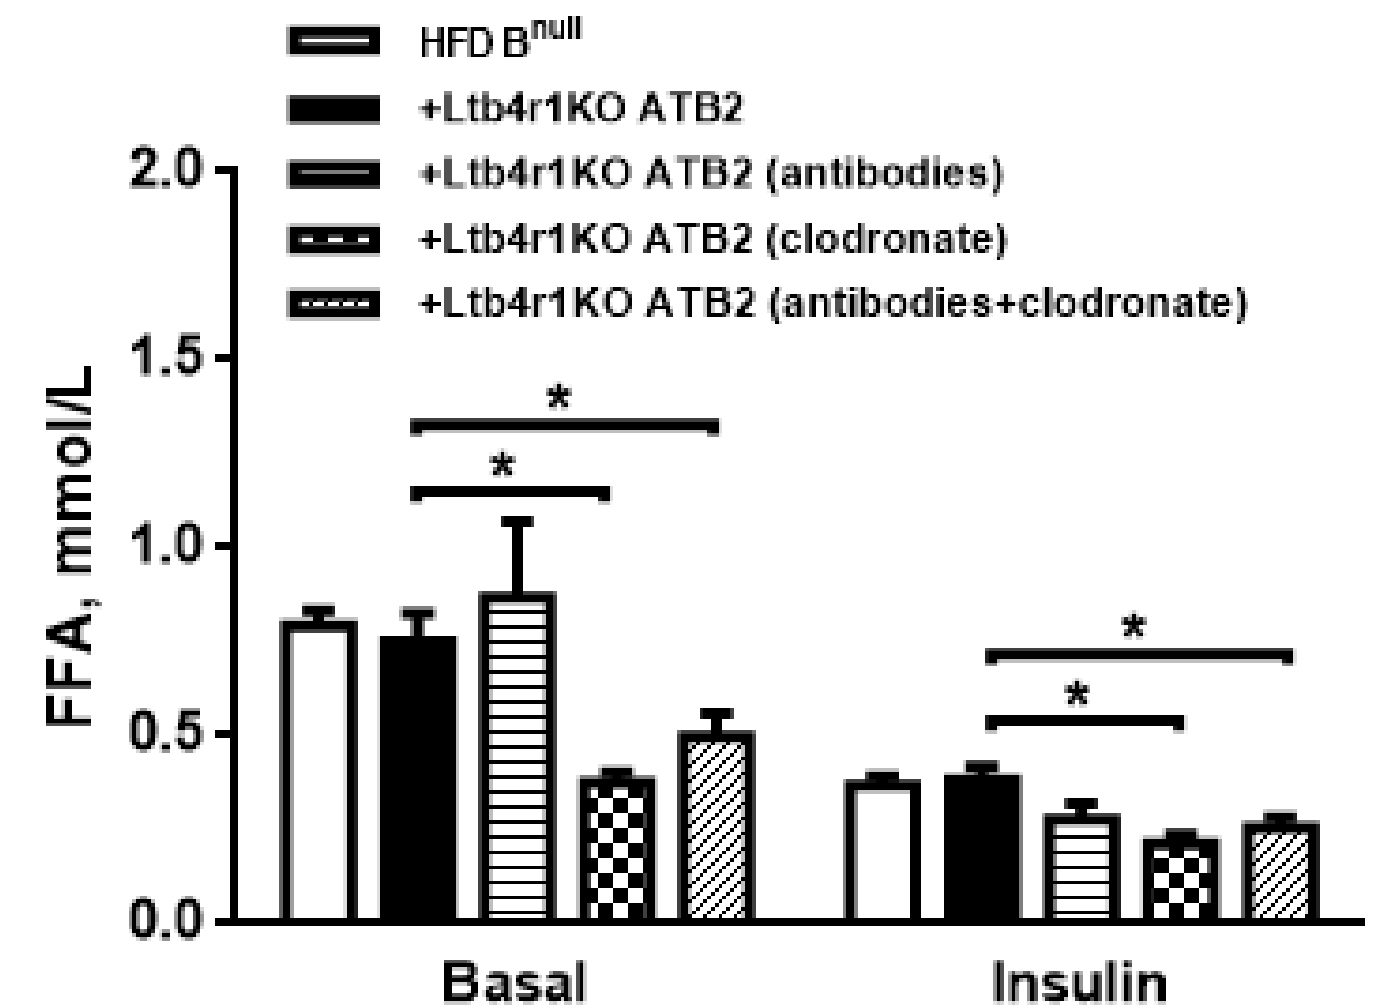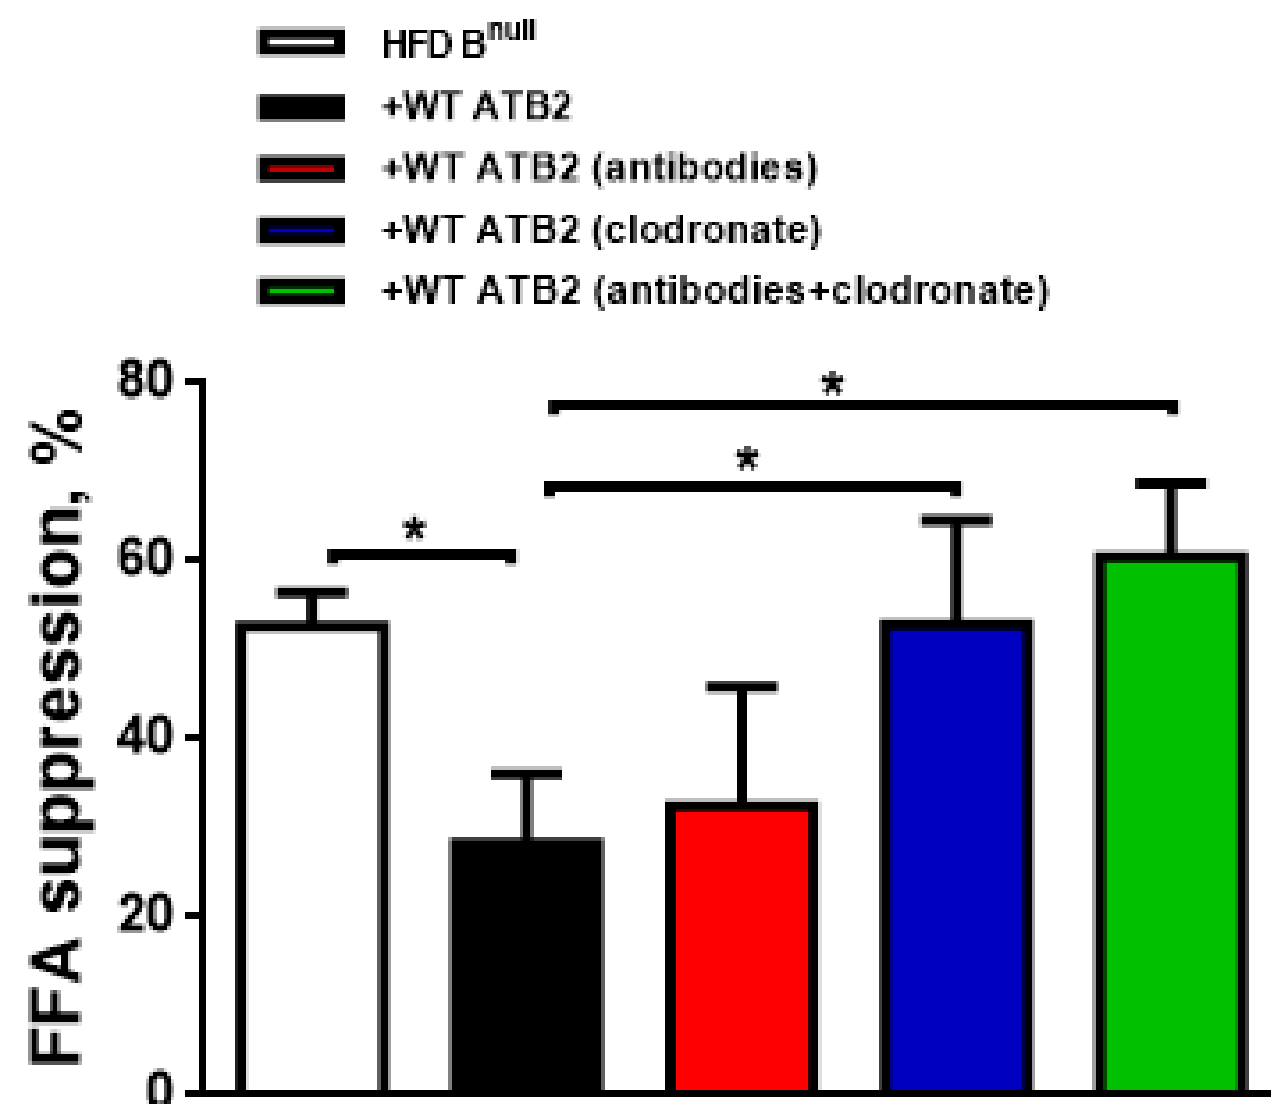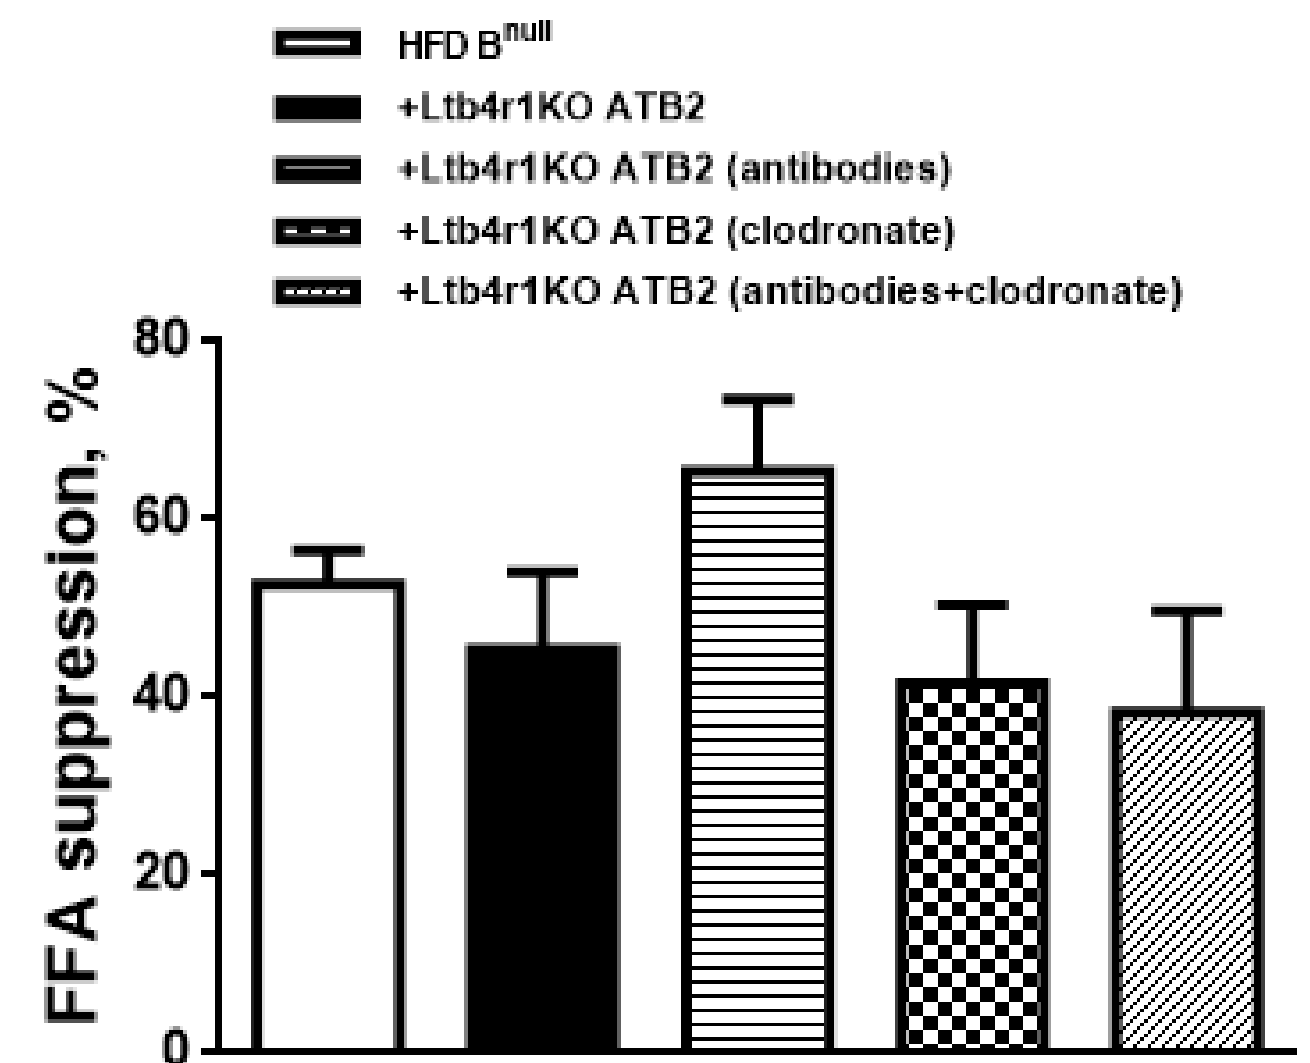

**Supplementary Figure 7.** After 8 hours fasting (Basal) or after 5 min insulin infusion (Insulin), plasma free fatty acid (FFA) levels were measured in HFD B<sup>null</sup>/ ATB2 mice pretreated with antibodies and/or clodronate. Data are presented as mean  $\pm$  SEM. n=6 per group. \* $P$ <0.05, all panels were analyzed by one-way ANOVA with Bonferroni's post test. HFD B<sup>null</sup>/ ATB2, HFD B<sup>null</sup> mice with ATB2 cell transfer.

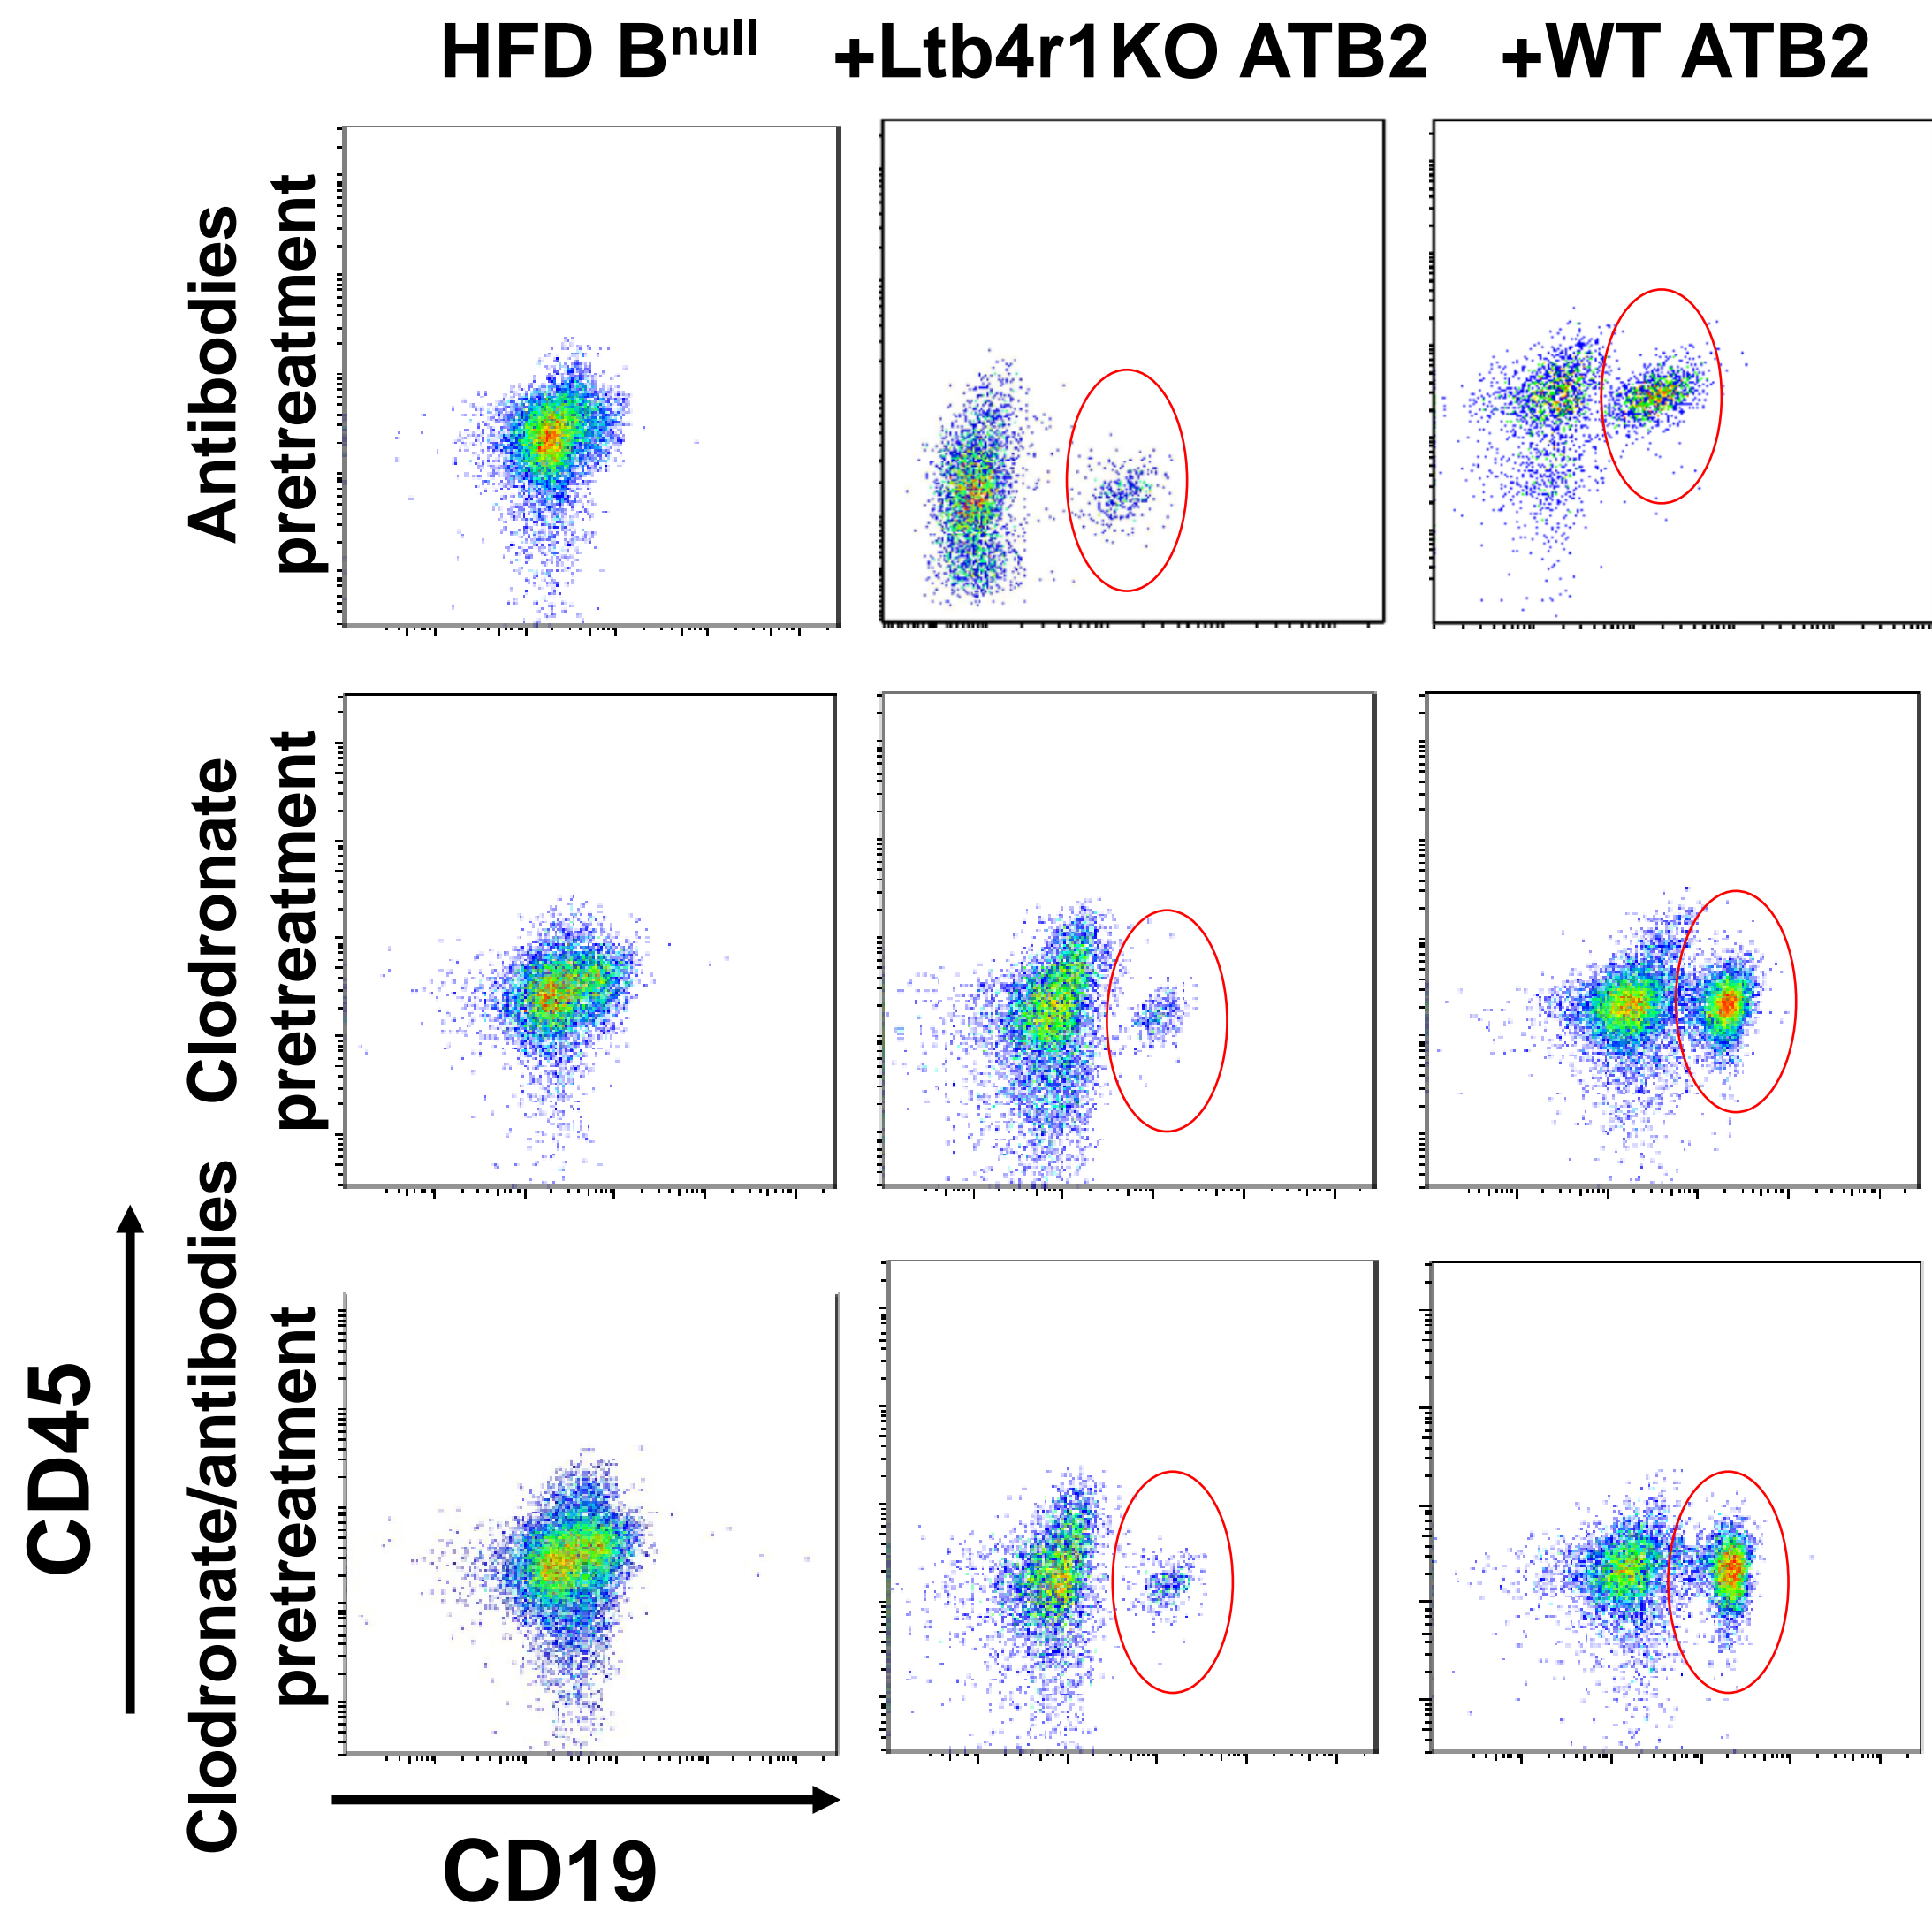

ATB2 cell recruitment in HFD B<sup>null</sup> mice with antibody pretreatment

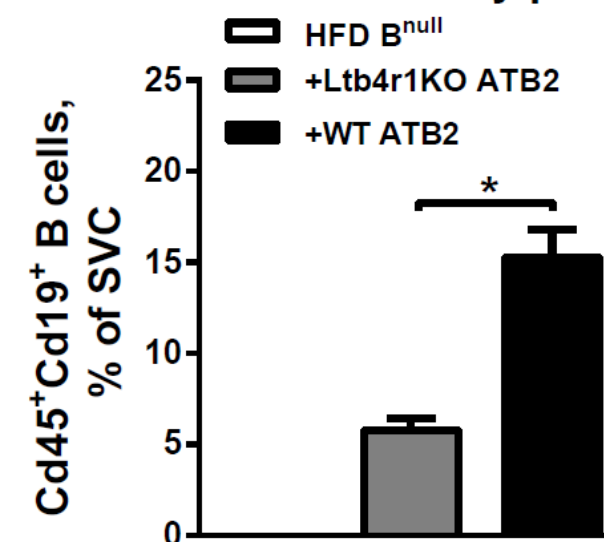

ATB2 cell recruitment in HFD B<sup>null</sup> mice with clodronate pretreatment

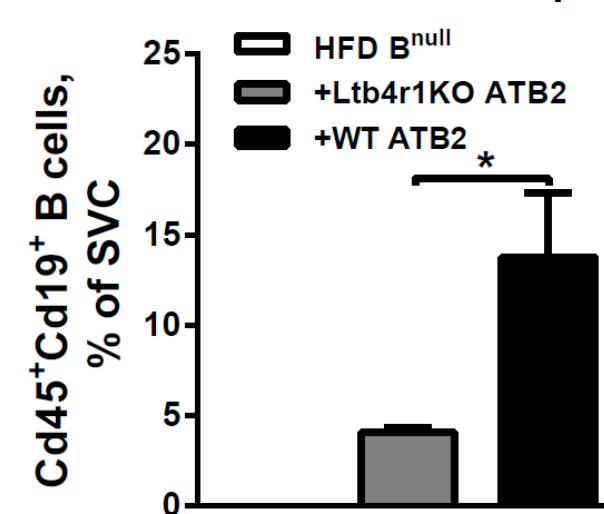

ATB2 cell recruitment in HFD B<sup>null</sup> mice with clodronate/antibody pretreatment

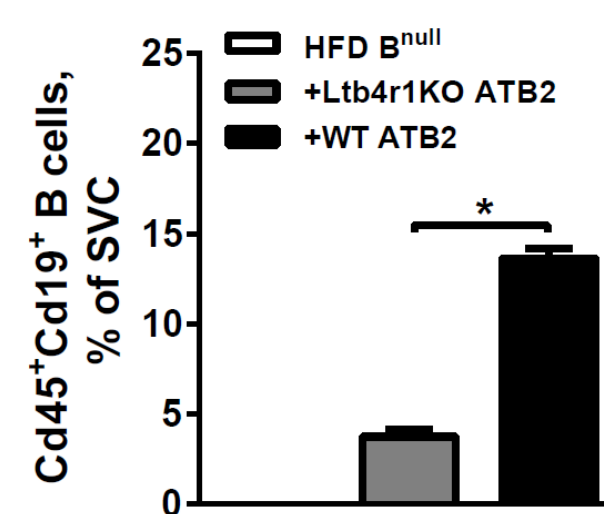

**Supplementary Figure 8.** Recruitment of donor B cells into VAT of HFD B<sup>null</sup> recipient mice with either T cell-depleting antibodies and/or clodronate pretreatment. Data are presented as mean  $\pm$  SEM. n=7 for antibodies pretreatment, and n=6 for the other groups. \* $P$ <0.05, all bar graphs were analyzed by one-way ANOVA with Bonferroni's post test.

**A****Glucose tolerance test**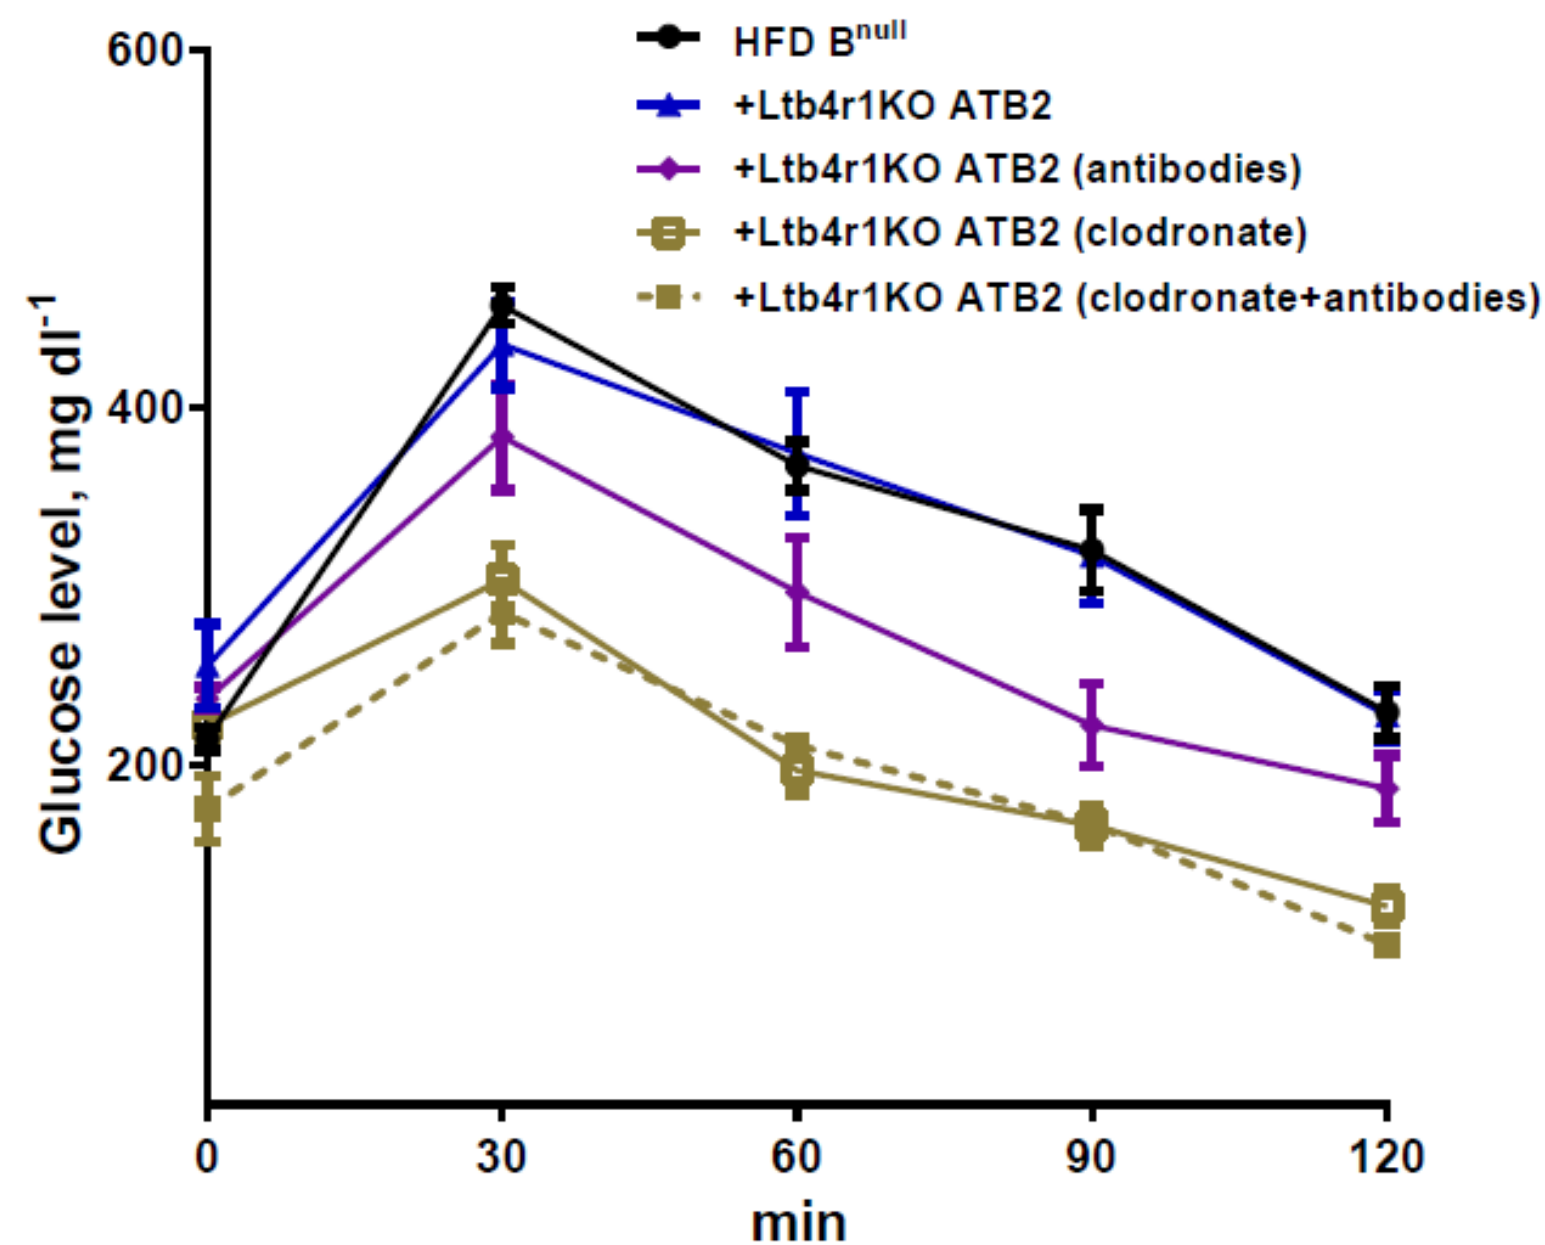**B****Insulin tolerance test**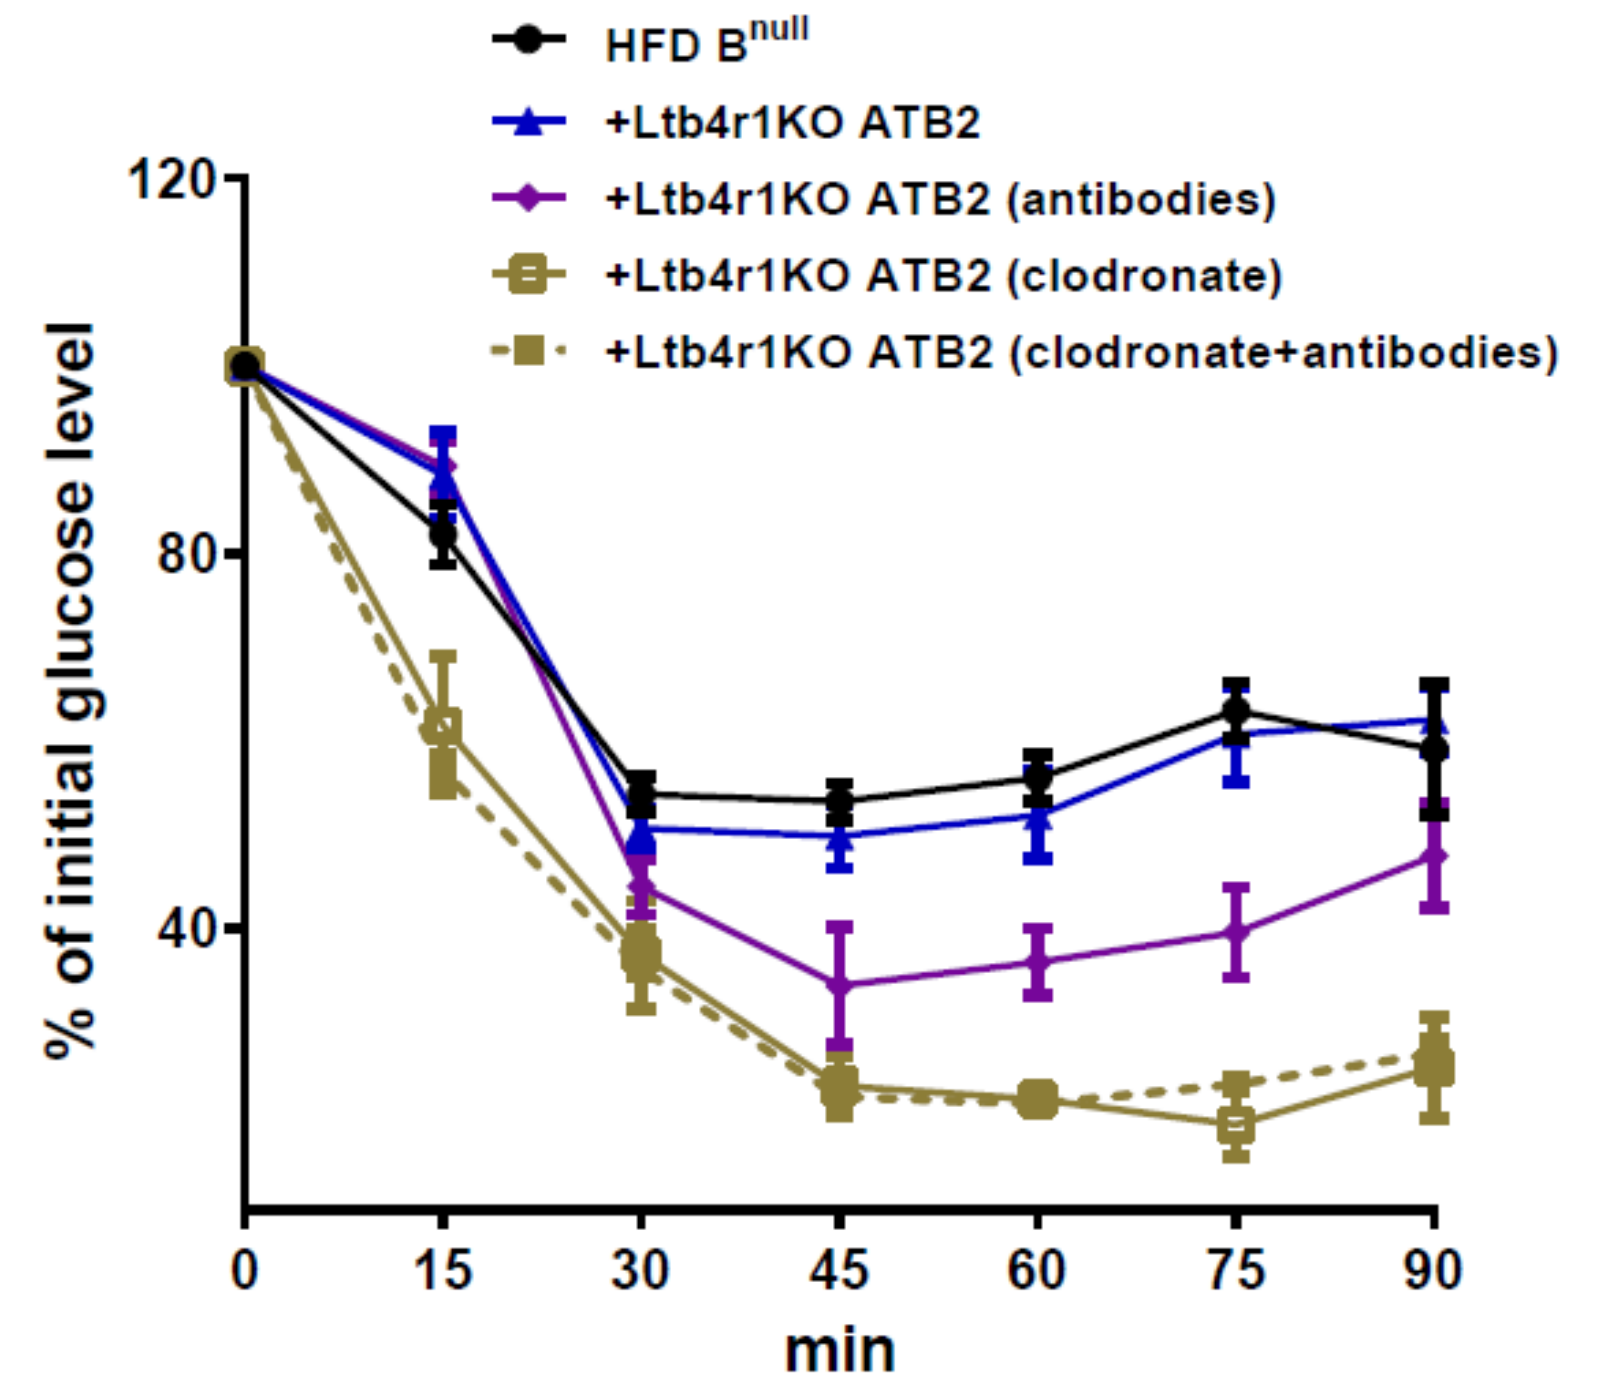

**Supplementary Figure 9.** Glucose tolerance (**A**) and insulin tolerance tests (**B**) in HFD  $B^{\text{null}}$ /Ltb4r1KO ATB2 mice pre-treated with clodronate or T cell-depleting antibodies. HFD  $B^{\text{null}}$ /Ltb4r1KO ATB2, HFD  $B^{\text{null}}$  mice with Ltb4r1KO ATB2 cell transfer. Please note that the GTT and ITT results for the HFD  $B^{\text{null}}$  mice are the same as in Figure 5A and B and are shown here again simply for comparative purposes. Data are presented as mean  $\pm$  SEM.  $n=8$  per group.  $*P<0.05$ , all panels were analyzed by one-way ANOVA with Bonferroni's post test.

**A**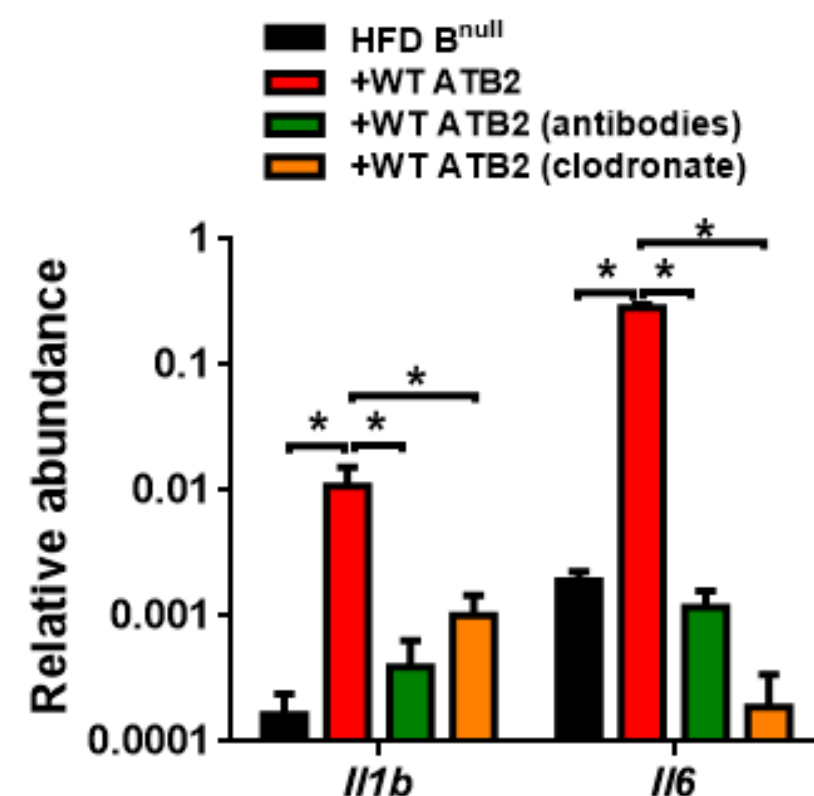**B**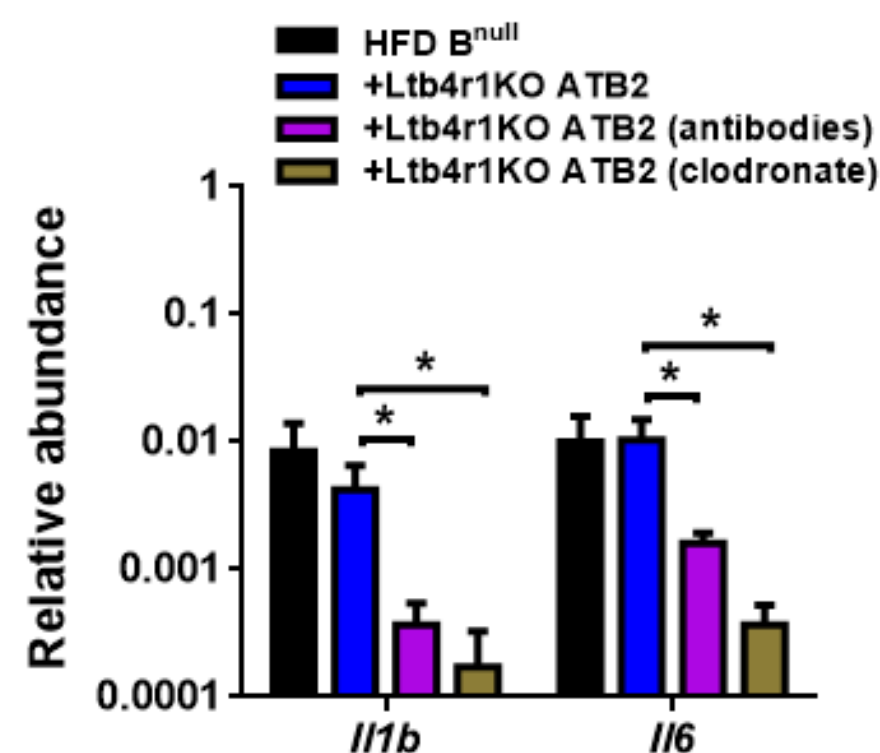**C**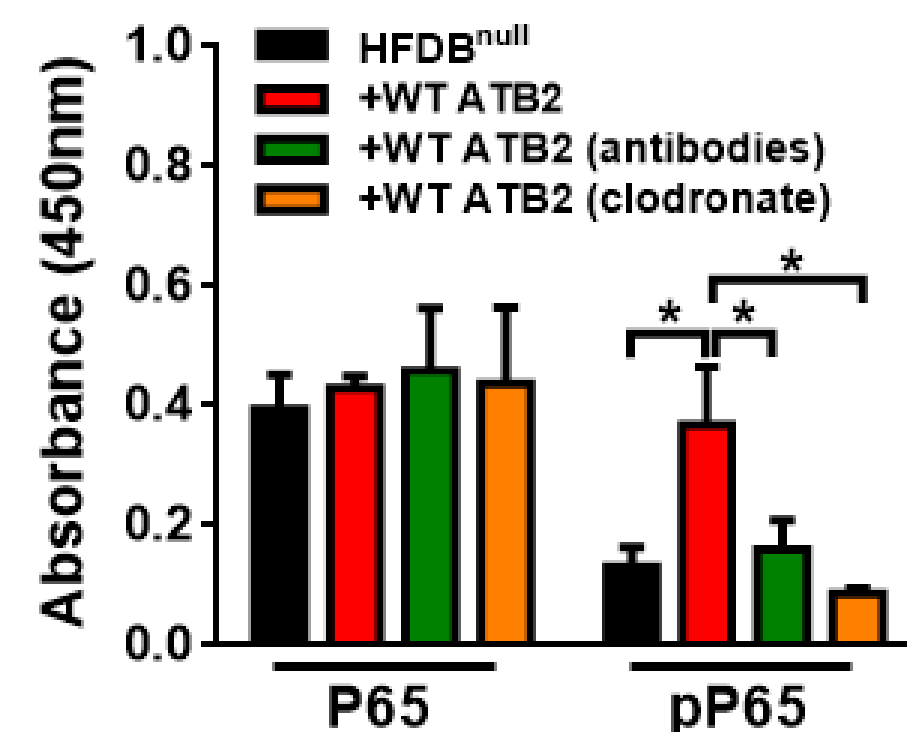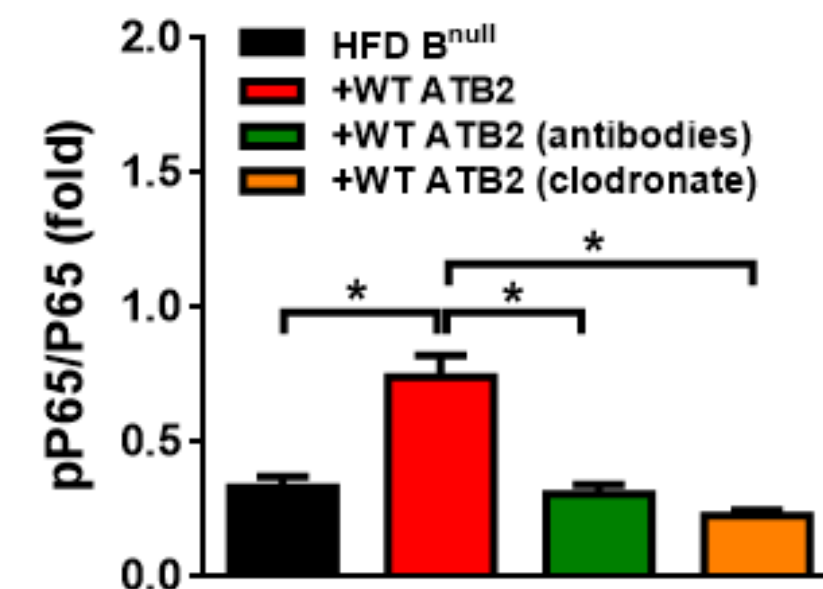**D**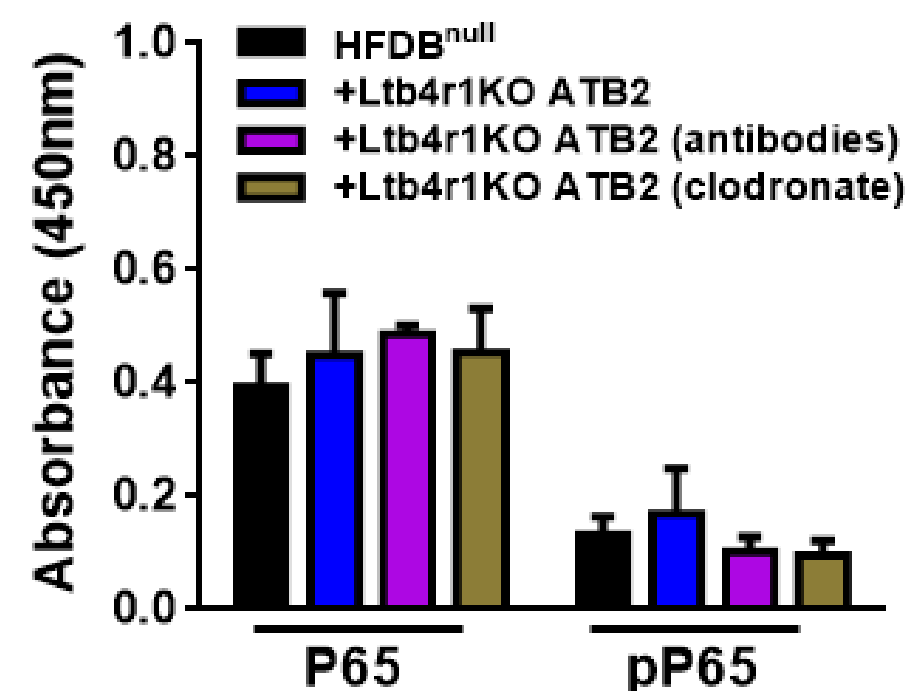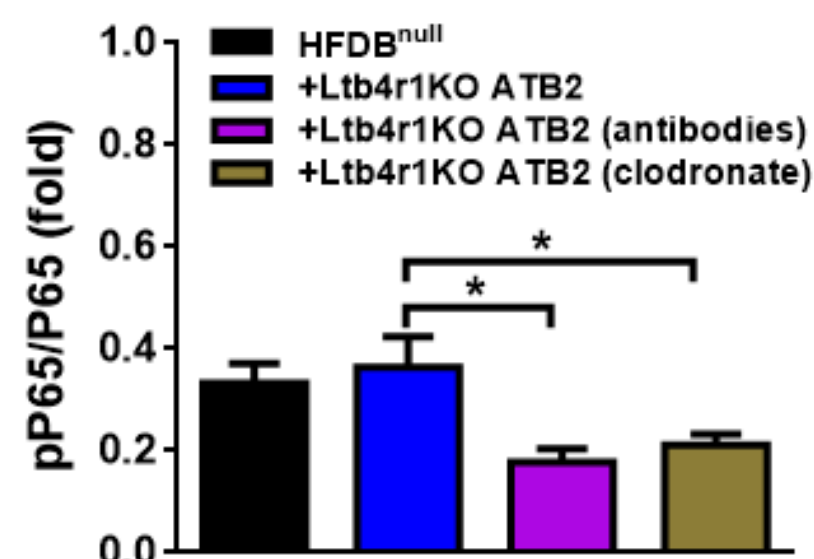**E**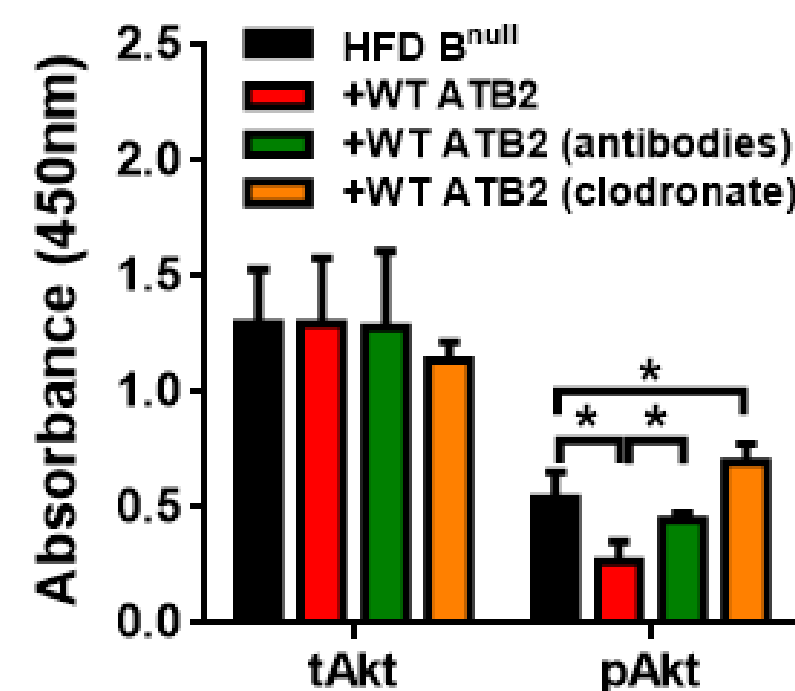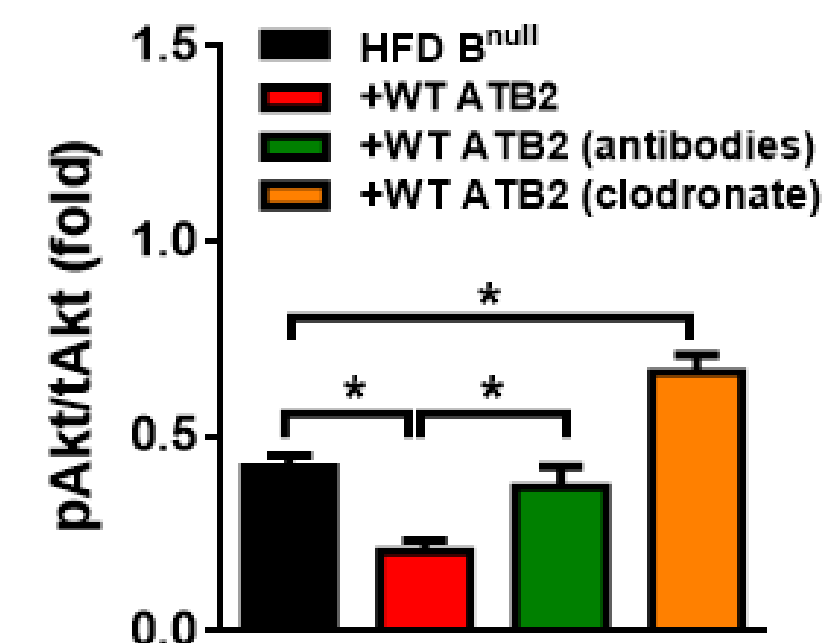**F**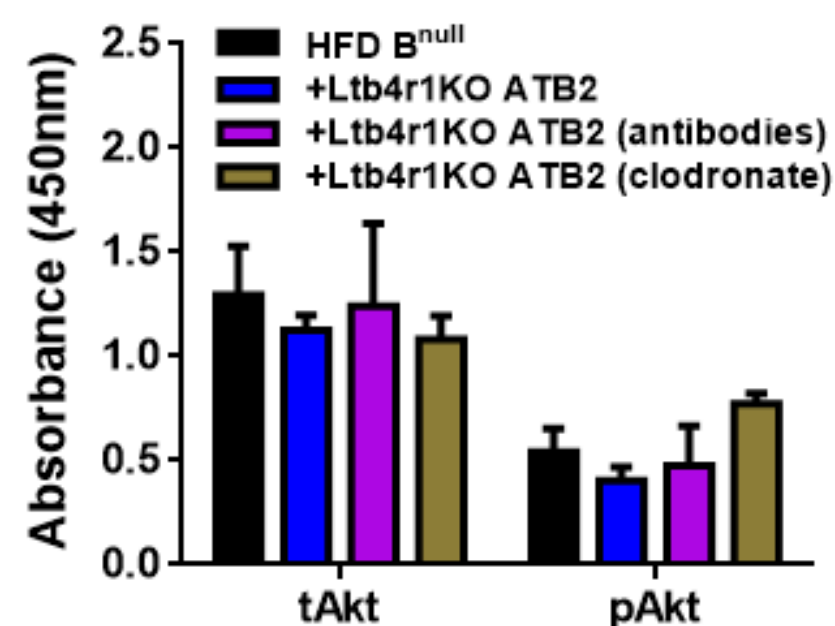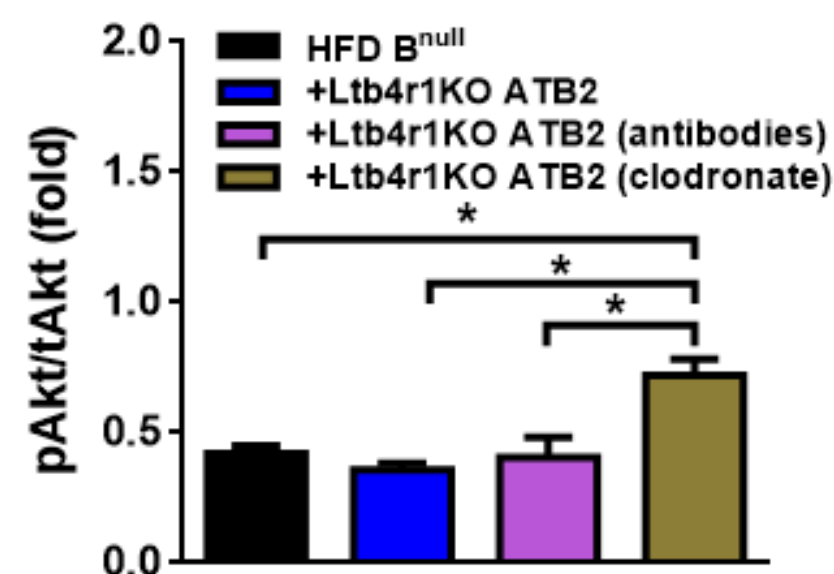

**Supplementary Figure 10.** After ATB2 cell transfer, proinflammatory cytokine expression (**A, B**), activation of Nfkb (**C, D**), and phosphorylation of Akt (**E, F**) in VAT of HFD B<sup>null</sup> mice pre-treated with either t cell-depleting antibodies or clodronate. Data are presented as mean  $\pm$  SEM. n=5 per group. \* $P$ <0.05, **all panels were analyzed** by one-way ANOVA with Bonferroni's post test.

**A**

— M2  
— +Ltb4r1KO ATB2  
— +WT ATB2

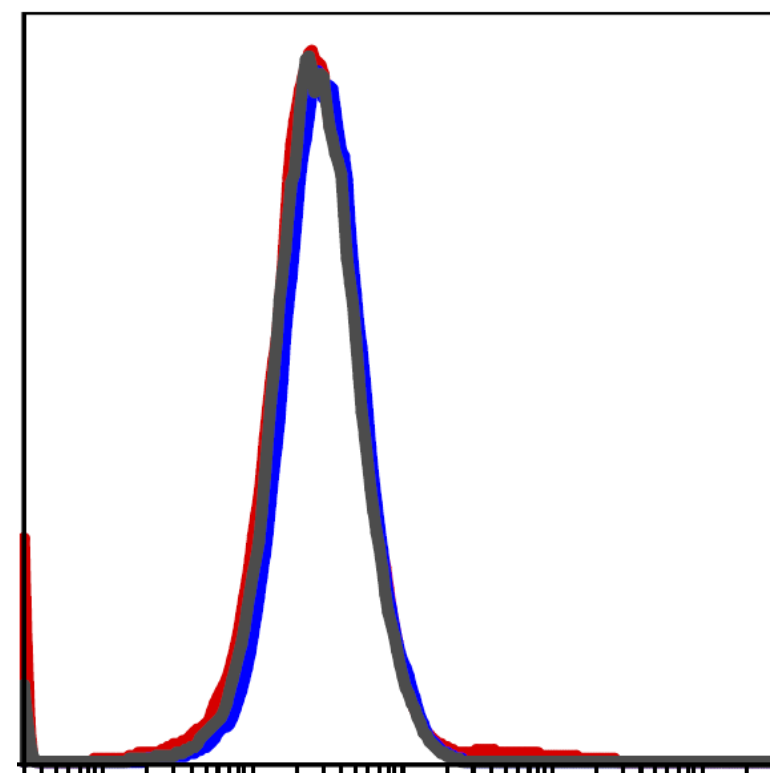

Cd69 →

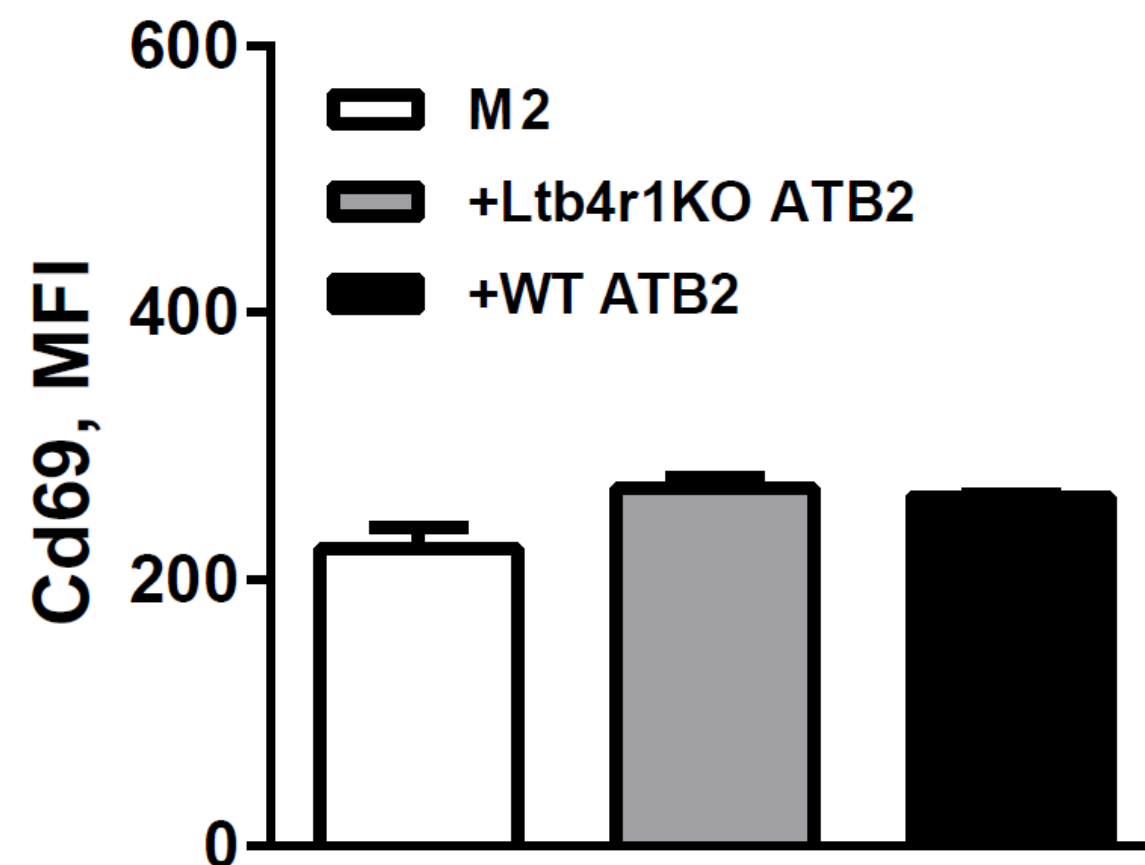**B**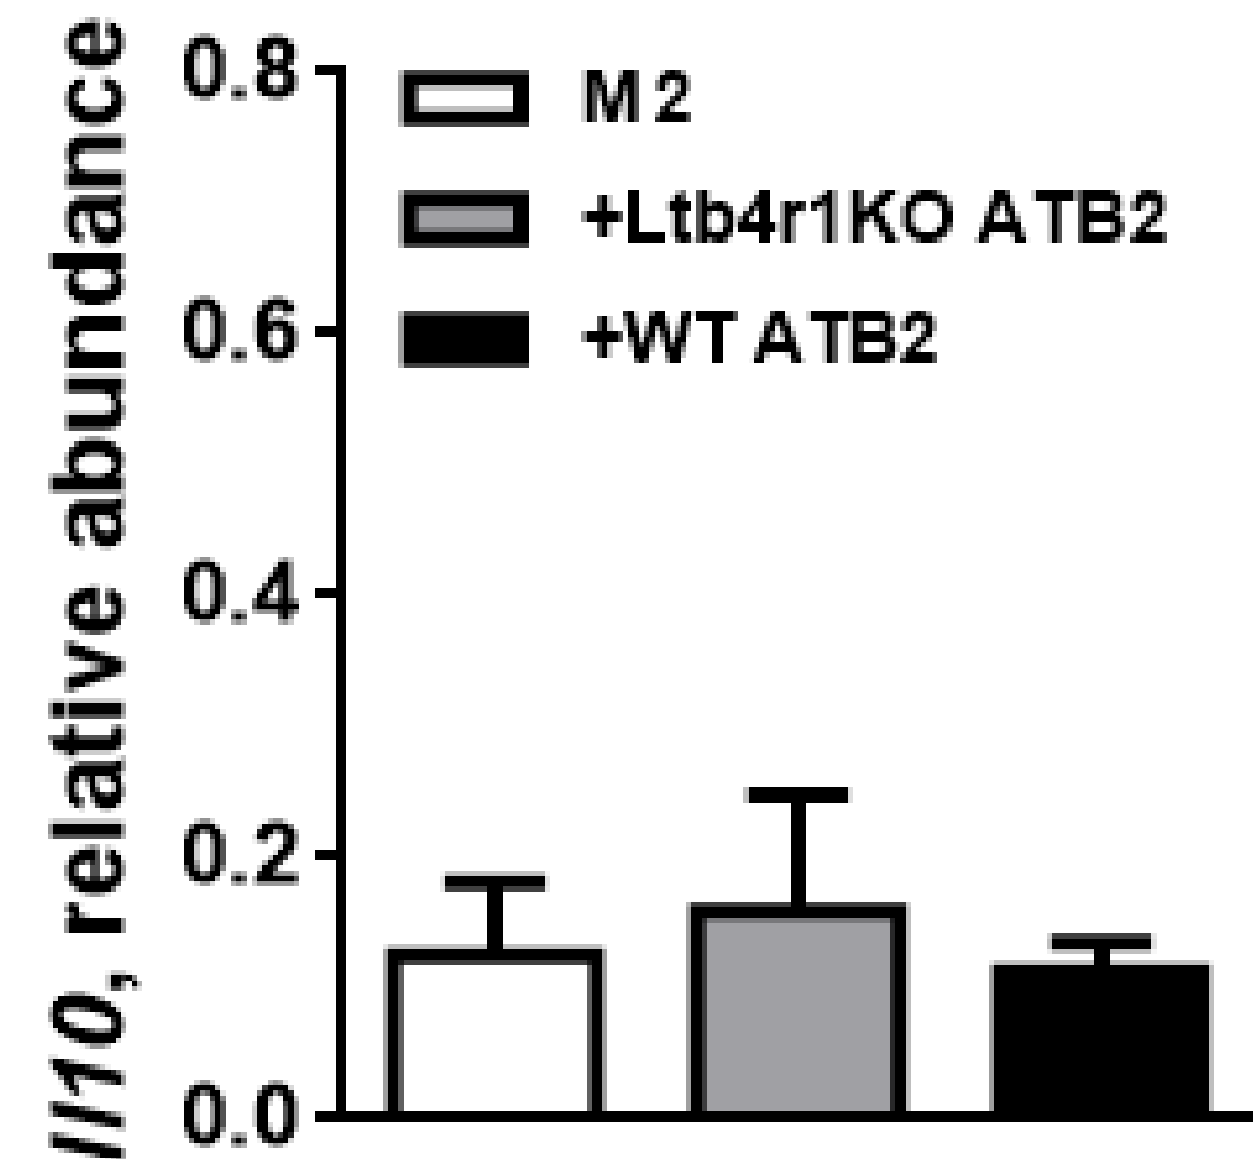

**Supplementary Figure 11.** Levels of the activation-related cell surface marker Cd69 (**A**) and gene expression of the anti-inflammatory cytokine *I/10* (**B**) in M2-like macrophages after co-culture with WT or Ltb4r1KO ATB2. Data are presented as mean  $\pm$  SEM. n=6 per group. All panels were analyzed by one-way ANOVA with Bonferroni's post test.

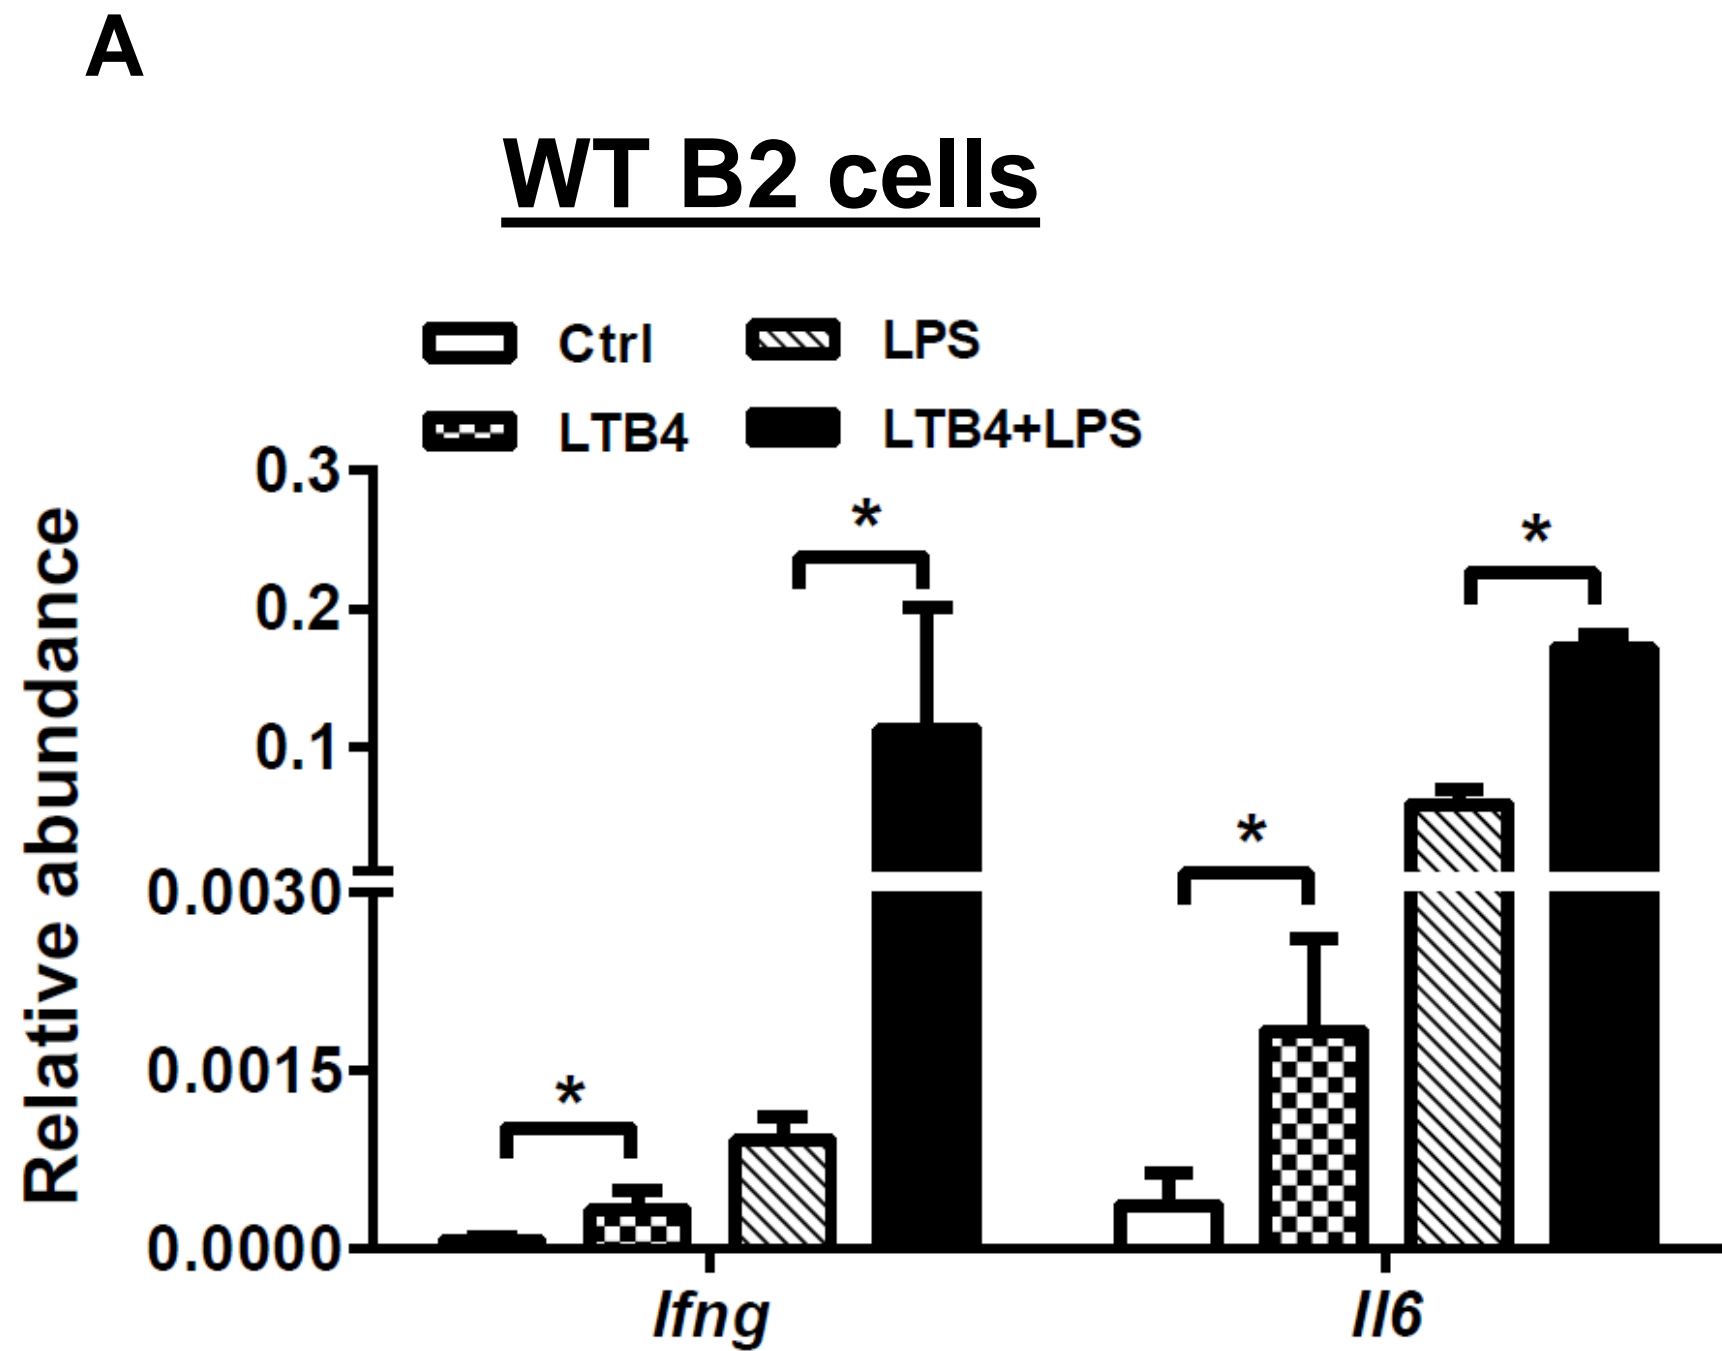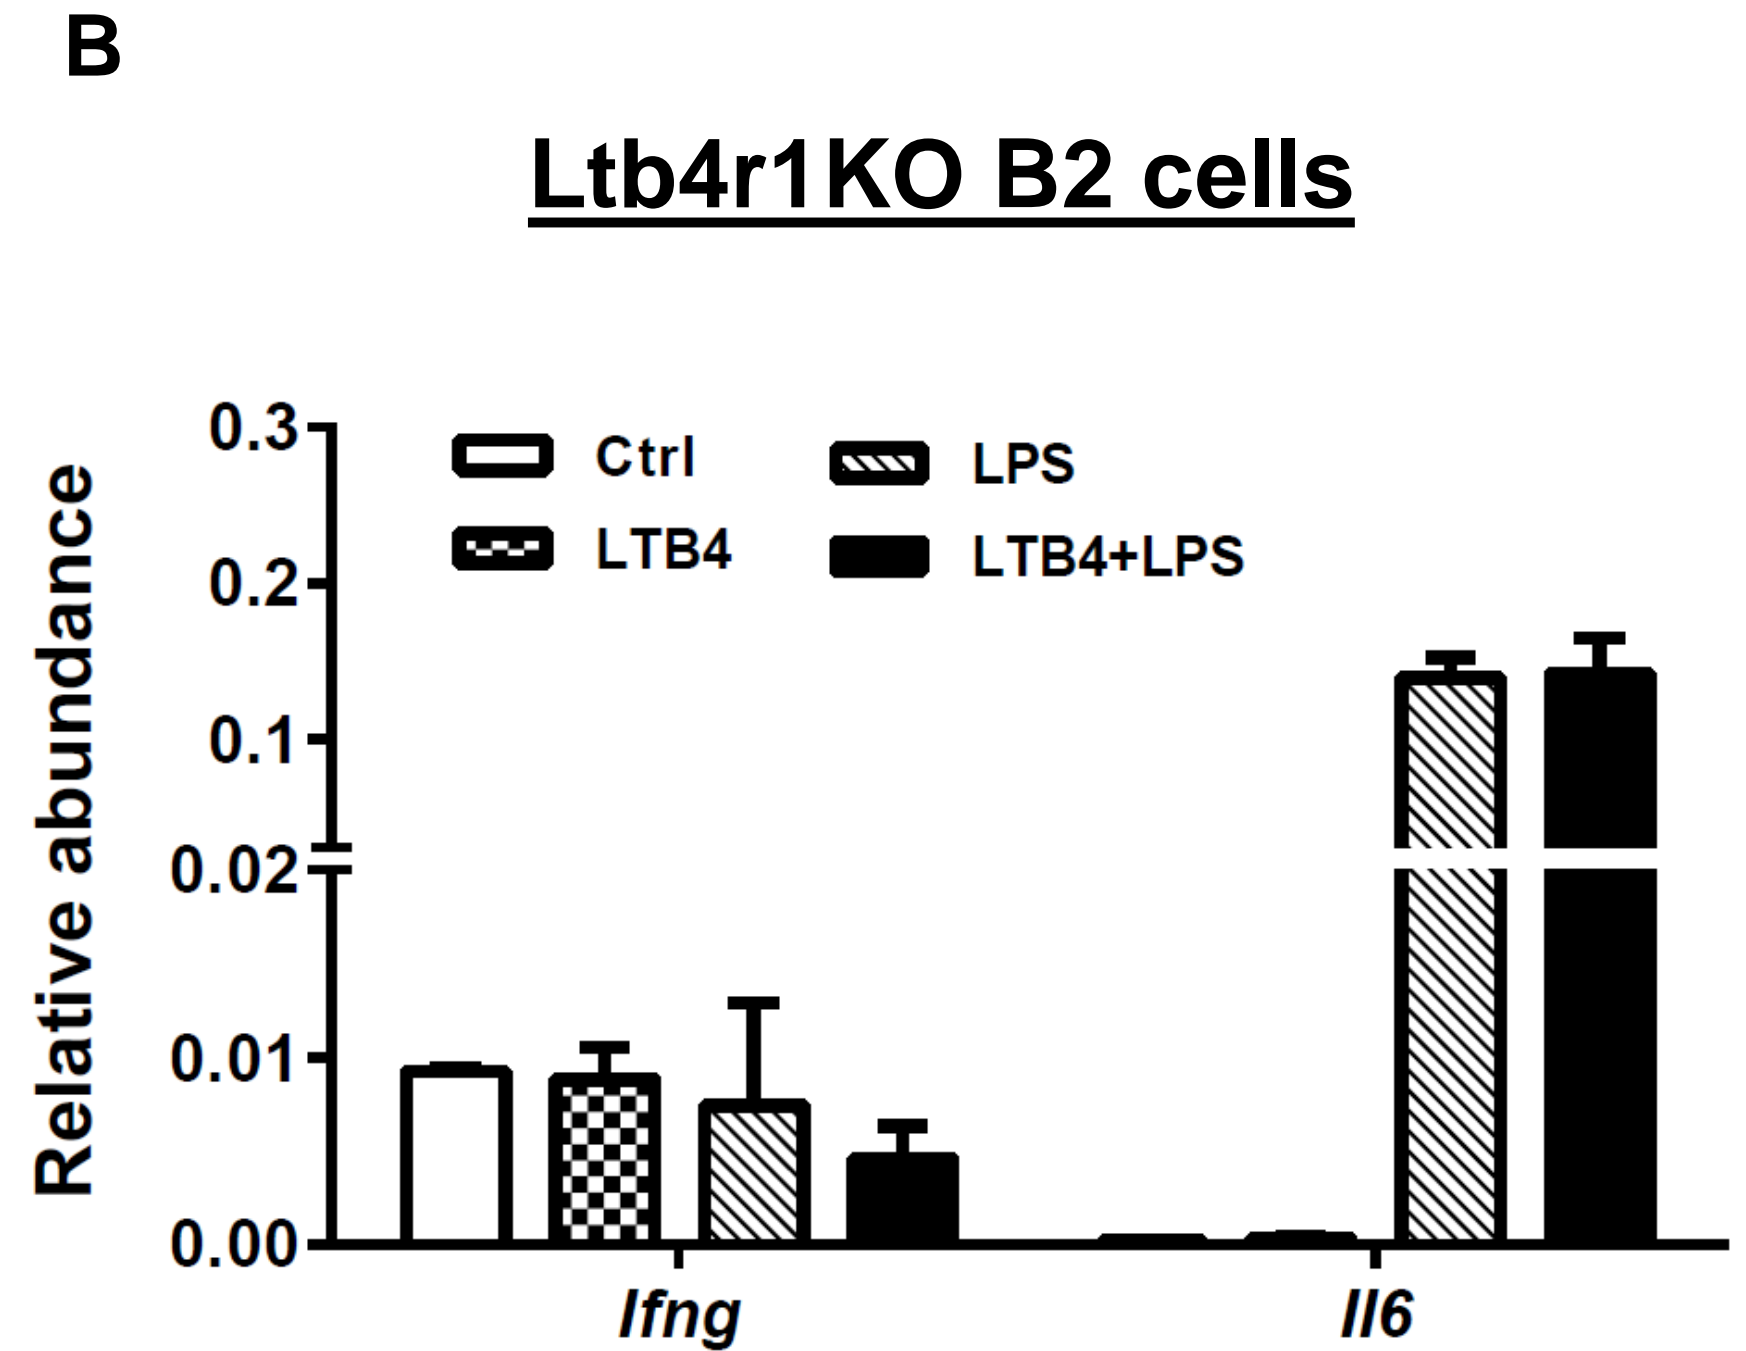

**Supplementary Figure 12.** Production of the proinflammatory cytokines *Ifng* and *Il6* during B2 cell activation in the presence of LPS or LTB4. Data are presented as mean  $\pm$  SEM. n=6 per group. \* $P<0.05$ , all panels were analyzed by one-way ANOVA with Bonferroni's post test.
